# Supplementary material for: Host–Pathogen Responses to Pandemic Influenza H1N1pdm09 in a Human Respiratory Airway Model
Source: MDPI journal article supplement (doi:10.3390/v12060679), 2020-06-24
Supplement: s1 [file s1]

**Table S1: TaqMan Probes used for RT-qPCR analyses**

| HGNC Gene Symbol <sup>1</sup> | HGNC Gene Name <sup>1</sup>                       | HGNC ID <sup>1</sup> | Common Alias Symbol(s) <sup>1</sup> | Alias Name <sup>1</sup>                                                          | Gene Group <sup>1</sup>                              | TaqMan Probe ID | Amplicon length (bp) |
|-------------------------------|---------------------------------------------------|----------------------|-------------------------------------|----------------------------------------------------------------------------------|------------------------------------------------------|-----------------|----------------------|
| CSF2                          | Colony stimulating factor 2                       | 2434                 | GM-CSF                              | Granulocyte-macrophage colony stimulating factor                                 | -                                                    | Hs00929873_m1   | 85                   |
| CCL2                          | C-C motif chemokine ligand 2                      | 10618                | MCP-1                               | Monocyte chemoattractant protein-1                                               | Chemokine ligands                                    | Hs00234140_m1   | 101                  |
| CCL3                          | C-C motif chemokine ligand 3                      | 10627                | MIP1- $\alpha$                      | Macrophage inflammatory protein 1- $\alpha$                                      | Chemokine ligands                                    | Hs00234142_m1   | 53                   |
| CCL5                          | C-C motif chemokine ligand 5                      | 10632                | RANTES                              | Regulated on activation, normal T cell expressed and secreted                    | Chemokine ligands                                    | Hs00982282_m1   | 70                   |
| CXCL8                         | C-X-C motif chemokine ligand 8                    | 6025                 | IL-8                                | Interleukin 8                                                                    | Chemokine ligands, Interleukins                      | Hs00174103_m1   | 101                  |
| CXCL10                        | C-X-C motif chemokine ligand 10                   | 10637                | IP-10                               | Interferon gamma-induced protein 10                                              | Chemokine ligands                                    | Hs00171042_m1   | 98                   |
| GAPDH                         | Glyceraldehyde-3-phosphate dehydrogenase          | 4141                 | GAPD                                | -                                                                                | -                                                    | Hs99999905_m1   | 122                  |
| IFNB1                         | Interferon $\beta$ 1                              | 5434                 | IFF, IFB                            | Interferon, fibroblast                                                           | Interferons                                          | Hs01077958_s1   | 73                   |
| IL1B                          | Interleukin 1 $\beta$                             | 5992                 | IL1F2                               | Interleukin 1 family 2                                                           | Interleukins                                         | Hs01555410_m1   | 91                   |
| IL6                           | Interleukin 6                                     | 6018                 | BSF2, HGF                           | B cell stimulatory factor 2                                                      | Interleukins, Interferons, Interleukin 6 type family | Hs00985639_m1   | 66                   |
| IL10                          | Interleukin 10                                    | 5962                 | CSIF                                | Cytokine synthesis inhibitory factor                                             | Interleukins                                         | Hs00961622_m1   | 74                   |
| MUC5AC                        | Mucin 5AC, oligomeric mucus / gel-forming         | 7515                 | MUC5                                | mucin 5                                                                          | Mucins                                               | Hs01365616_m1   | 55                   |
| MUC5B                         | Mucin 5B, oligomeric mucus / gel-forming          | 7516                 | MG1                                 | Mucin glycoprotein 1                                                             | Mucins; MicroRNA protein coding host genes           | Hs00861588_m1   | 60                   |
| RSAD2                         | Radical S-adenosyl methionine domain containing 2 | 30908                | viperin                             | Virus inhibitory protein, endoplasmic reticulum associated, interferon inducible | -                                                    | Hs00369813_m1   | 76                   |
| TNF                           | Tumor necrosis factor                             | 11892                | TNFA                                | Tumor necrosis factor $\alpha$                                                   | Tumor necrosis factor superfamily                    | Hs00174128_m1   | 80                   |

1. Braschi, B.;Denny, P.;Gray, K.;Jones, T.;Seal, R.;Tweedie, S.;Yates, B.;Bruford, E., Genenames.org: the HGNC and VGNC resources in 2019. *Nucleic Acids Res*, **2019**. 47(D1): p. D786-D792. DOI: 10.1093/nar/gky930.

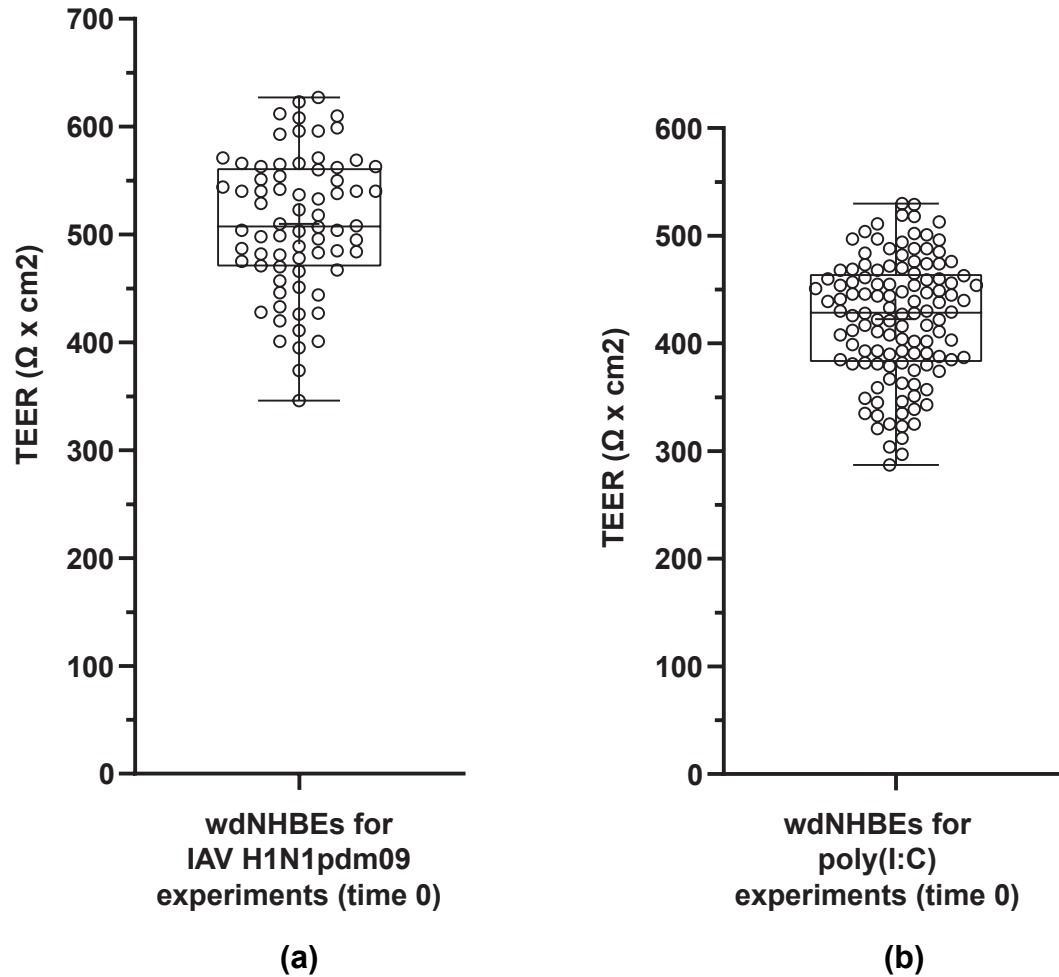

**Figure S1. Transepithelial electrical resistance (TEER) readings of wdNHBE cells**

Prior to infection with (a) IAV H1N1pdm09 or treatment with (b) poly(I:C), time=0 TEER values were recorded with an EVOM2. Data was pooled from three experiments for IAV H1N1pdm09 (n = 72 transwells) and three poly(I:C) experiments (n=120 transwells) was pooled (open circles) and is presented as box and whisker plots showing the mean (+), median, interquartile range and maximum and minimum values. The ends of each box represent the upper and lower quartiles, the horizontal line within the box indicates the median and error bars depict maximum and minimum TEER values.

Table S2: TEER readings ( $\Omega$  &  $\Omega$  x cm2) wdNHBE cells - IAV H1N1pdm09  
TEER readings ( $\Omega$ )

MOCK

|           |      |      | TEER readings ( $\Omega$ ) |                      |      |      |      |      |
|-----------|------|------|----------------------------|----------------------|------|------|------|------|
|           |      |      | Pre-infection              | Hours post-infection |      |      |      |      |
| Treatment | Expt | Well | -1                         | 1                    | 6    | 18   | 24   | 30   |
| Mock      | a    | 1    | 1677                       | 769                  | 1242 | 1402 | 1308 | *    |
| Mock      | a    | 2    | 1385                       | 597                  | 914  | 1061 | 1075 | 1345 |
| Mock      | a    | 3    | 1470                       | 1025                 | 1168 | 1096 | 1083 | 1301 |
| Mock      | a    | 4    | 1290                       | 1281                 | 1343 | 1357 | 1162 | 1566 |
| Mock      | a    | 5    | 1416                       | 1161                 | 1163 | 1339 | 1311 | 1340 |
| Mock      | a    | 6    | 1499                       | 1653                 | 1436 | 1455 | 1458 | 1449 |
| Mock      | a    | 7    | 1615                       | 1671                 | 1403 | 1482 | 1520 | 1488 |
| Mock      | a    | 8    | 1513                       | 1353                 | 1230 | 1503 | 1535 | 1564 |
| Mock      | a    | 9    | 1806                       | 1465                 | 1608 | 1712 | 1680 | 1072 |
| Mock      | a    | 10   | 1729                       | 1594                 | 1639 | 1560 | 1545 | 1345 |
| Mock      | a    | 11   | 1626                       | 1069                 | 1500 | 1441 | 1464 | 1267 |
| Mock      | a    | 12   | 1642                       | 1314                 | 1517 | 1529 | 1586 | 1398 |
| Mock      | b    | 1    | 1350                       | 1145                 | 1305 | 1352 | 1330 | 1394 |
| Mock      | b    | 2    | 1423                       | 774                  | 1094 | 1443 | 1108 | 1339 |
| Mock      | b    | 3    | 1245                       | 1051                 | 1125 | 1290 | 1092 | 1312 |
| Mock      | b    | 4    | 1474                       | 1287                 | 1264 | 1209 | 1110 | 1353 |
| Mock      | b    | 5    | 1716                       | 1507                 | 1245 | 1308 | 1308 | 1419 |
| Mock      | b    | 6    | 1529                       | 1271                 | 1177 | 1419 | 1421 | 1668 |
| Mock      | b    | 7    | 1636                       | 1249                 | 1056 | 1316 | 1372 | 1690 |
| Mock      | b    | 8    | 1637                       | 1416                 | 1144 | 959  | 1304 | 1117 |
| Mock      | b    | 9    | 1666                       | 1125                 | 1190 | 1335 | 1363 | 1194 |
| Mock      | b    | 10   | 1697                       | 1203                 | 1212 | 1363 | 1388 | 1466 |
| Mock      | b    | 11   | 1049                       | 1041                 | 1106 | 1221 | 1141 | 1315 |
| Mock      | b    | 12   | 1849                       | 1692                 | 1555 | 1399 | 1432 | 1163 |
| Mock      | c    | 1    | 1427                       | 1524                 | 1487 | 1369 | 1280 | 1615 |
| Mock      | c    | 2    | 1458                       | 1406                 | 1570 | 1463 | 1295 | 1630 |
| Mock      | c    | 3    | 1367                       | 1413                 | 1526 | 1555 | 1345 | 1659 |
| Mock      | c    | 4    | 1439                       | 1266                 | 1537 | 1559 | 1458 | 1762 |
| Mock      | c    | 5    | 1466                       | 1019                 | 1101 | 1255 | 1393 | 1453 |
| Mock      | c    | 6    | 1806                       | 1608                 | 1312 | 1428 | 1601 | 1609 |
| Mock      | c    | 7    | 1843                       | 1419                 | 1301 | 1536 | 1621 | 1659 |
| Mock      | c    | 8    | 1888                       | 1863                 | 1439 | 1564 | 1641 | 1642 |
| Mock      | c    | 9    | 1706                       | 1040                 | 1164 | 1163 | 1273 | 1350 |
| Mock      | c    | 10   | 1525                       | 1089                 | 1212 | 1159 | 1330 | 1273 |
| Mock      | c    | 11   | 1853                       | 1434                 | 1297 | 1222 | 1421 | 1476 |
| Mock      | c    | 12   | 1670                       | 1163                 | 1189 | 1102 | 1225 | 1297 |
| AVERAGE   |      |      | 1566                       | 1277                 | 1299 | 1359 | 1361 | 1429 |

IAV H1N1pdm09

|           |      |      | TEER readings ( $\Omega$ ) |                      |      |      |      |     |
|-----------|------|------|----------------------------|----------------------|------|------|------|-----|
|           |      |      | Pre-infection              | Hours post-infection |      |      |      |     |
| Treatment | Expt | Well | -1                         | 1                    | 6    | 18   | 24   | 30  |
| H1N1pdm09 | a    | 1    | 1294                       | 1295                 | 1602 | 1634 | 1004 | 451 |
| H1N1pdm09 | a    | 2    | 1273                       | 1580                 | 1601 | 1614 | 1471 | 659 |
| H1N1pdm09 | a    | 3    | 1214                       | 1064                 | 1251 | 1623 | 1246 | 647 |
| H1N1pdm09 | a    | 4    | 1604                       | 1521                 | 1621 | 1595 | 1153 | 505 |
| H1N1pdm09 | a    | 5    | 1716                       | 1451                 | 1241 | 1249 | 453  | 242 |
| H1N1pdm09 | a    | 6    | 1529                       | 1855                 | 1421 | 1302 | 545  | 281 |
| H1N1pdm09 | a    | 7    | 1636                       | 1669                 | 1422 | 715  | 380  | 220 |
| H1N1pdm09 | a    | 8    | 1637                       | 1793                 | 1842 | 1330 | 450  | 263 |
| H1N1pdm09 | a    | 9    | 1814                       | 1375                 | 1398 | 1180 | 523  | 195 |
| H1N1pdm09 | a    | 10   | 1298                       | 1043                 | 1505 | 931  | 351  | 162 |
| H1N1pdm09 | a    | 11   | 1731                       | 1171                 | 1479 | 1105 | 528  | 241 |
| H1N1pdm09 | a    | 12   | 1411                       | 1363                 | 1330 | 731  | 365  | 200 |
| H1N1pdm09 | b    | 1    | 1344                       | 1535                 | 1371 | 1345 | 934  | 782 |
| H1N1pdm09 | b    | 2    | 1132                       | 951                  | 1040 | 1153 | 838  | 854 |
| H1N1pdm09 | b    | 3    | 1461                       | 1338                 | 1298 | 1271 | 1078 | 839 |
| H1N1pdm09 | b    | 4    | 1216                       | 1181                 | 1289 | 1398 | 1065 | 746 |
| H1N1pdm09 | b    | 5    | 1569                       | 1442                 | 1276 | 1344 | 680  | 328 |
| H1N1pdm09 | b    | 6    | 1632                       | 1379                 | 1371 | 1491 | 872  | 435 |
| H1N1pdm09 | b    | 7    | 1464                       | 1536                 | 1271 | 1364 | 858  | 406 |
| H1N1pdm09 | b    | 8    | 1448                       | 1526                 | 1195 | 1232 | 744  | 355 |
| H1N1pdm09 | b    | 9    | 1713                       | 1022                 | 1223 | 1353 | 889  | 380 |
| H1N1pdm09 | b    | 10   | 1311                       | 1275                 | 1105 | 834  | 462  | 205 |
| H1N1pdm09 | b    | 11   | 1707                       | 1558                 | 1395 | 840  | 606  | 211 |
| H1N1pdm09 | b    | 12   | 1702                       | 1471                 | 1334 | 1305 | 698  | 197 |
| H1N1pdm09 | c    | 1    | 1536                       | 1511                 | 1580 | 1436 | 1291 | 649 |
| H1N1pdm09 | c    | 2    | 1510                       | 1339                 | 1387 | 1243 | 1098 | 919 |
| H1N1pdm09 | c    | 3    | 1545                       | 899                  | 1184 | 1040 | 895  | 719 |
| H1N1pdm09 | c    | 4    | 1198                       | 1021                 | 1145 | 1001 | 856  | 969 |
| H1N1pdm09 | c    | 5    | 1539                       | 1650                 | 1266 | 1378 | 924  | 491 |
| H1N1pdm09 | c    | 6    | 1503                       | 1392                 | 1179 | 1313 | 747  | 323 |
| H1N1pdm09 | c    | 7    | 1483                       | 1496                 | 1229 | 1222 | 527  | 285 |
| H1N1pdm09 | c    | 8    | 1899                       | 1249                 | 1339 | 1683 | 1131 | 388 |
| H1N1pdm09 | c    | 9    | 1723                       | 1508                 | 1233 | 1249 | 864  | 335 |
| H1N1pdm09 | c    | 10   | 1584                       | 1110                 | 1189 | 1096 | 618  | 262 |
| H1N1pdm09 | c    | 11   | 1796                       | 1753                 | 1476 | 1340 | 692  | 265 |
| H1N1pdm09 | c    | 12   | 1648                       | 1629                 | 1367 | 1153 | 676  | 287 |
| AVERAGE   |      |      | 1523                       | 1388                 | 1346 | 1253 | 792  | 436 |

TEER readings ( $\Omega$  x cm2)

| Transwell area 0.33 cm <sup>2</sup> |      |      | TEER readings ( $\Omega$ x cm <sup>2</sup> ) |                      |     |     |     |     |
|-------------------------------------|------|------|----------------------------------------------|----------------------|-----|-----|-----|-----|
|                                     |      |      | Pre-infection                                | Hours post-infection |     |     |     |     |
| Treatment                           | Expt | Well | -1                                           | 1                    | 6   | 18  | 24  | 30  |
| Mock                                | a    | 1    | 554                                          | 254                  | 410 | 463 | 432 |     |
| Mock                                | a    | 2    | 457                                          | 197                  | 302 | 350 | 355 | 444 |
| Mock                                | a    | 3    | 485                                          | 338                  | 386 | 362 | 358 | 429 |
| Mock                                | a    | 4    | 426                                          | 423                  | 443 | 448 | 384 | 517 |
| Mock                                | a    | 5    | 467                                          | 383                  | 384 | 442 | 433 | 442 |
| Mock                                | a    | 6    | 495                                          | 546                  | 474 | 480 | 481 | 478 |
| Mock                                | a    | 7    | 533                                          | 552                  | 463 | 489 | 501 | 491 |
| Mock                                | a    | 8    | 499                                          | 447                  | 406 | 496 | 506 | 516 |
| Mock                                | a    | 9    | 596                                          | 484                  | 531 | 565 | 554 | 354 |
| Mock                                | a    | 10   | 571                                          | 526                  | 541 | 515 | 510 | 444 |
| Mock                                | a    | 11   | 537                                          | 353                  | 495 | 476 | 483 | 418 |
| Mock                                | a    | 12   | 542                                          | 434                  | 501 | 505 | 523 | 461 |
| Mock                                | b    | 1    | 446                                          | 378                  | 431 | 446 | 439 | 460 |
| Mock                                | b    | 2    | 470                                          | 255                  | 361 | 476 | 366 | 442 |
| Mock                                | b    | 3    | 411                                          | 347                  | 371 | 426 | 360 | 433 |
| Mock                                | b    | 4    | 487                                          | 425                  | 417 | 399 | 366 | 447 |
| Mock                                | b    | 5    | 566                                          | 497                  | 411 | 432 | 432 | 468 |
| Mock                                | b    | 6    | 504                                          | 420                  | 388 | 468 | 469 | 551 |
| Mock                                | b    | 7    | 540                                          | 412                  | 348 | 434 | 453 | 558 |
| Mock                                | b    | 8    | 540                                          | 467                  | 377 | 316 | 430 | 369 |
| Mock                                | b    | 9    | 550                                          | 371                  | 393 | 441 | 450 | 394 |
| Mock                                | b    | 10   | 560                                          | 397                  | 400 | 450 | 458 | 484 |
| Mock                                | b    | 11   | 346                                          | 344                  | 365 | 403 | 377 | 434 |
| Mock                                | b    | 12   | 610                                          | 558                  | 513 | 462 | 473 | 384 |
| Mock                                | c    | 1    | 471                                          | 503                  | 491 | 452 | 423 | 533 |
| Mock                                | c    | 2    | 481                                          | 464                  | 518 | 483 | 427 | 538 |
| Mock                                | c    | 3    | 451                                          | 466                  | 504 | 513 | 444 | 548 |
| Mock                                | c    | 4    | 475                                          | 418                  | 507 | 515 | 481 | 582 |
| Mock                                | c    | 5    | 484                                          | 336                  | 363 | 414 | 460 | 480 |
| Mock                                | c    | 6    | 596                                          | 531                  | 433 | 471 | 528 | 531 |
| Mock                                | c    | 7    | 608                                          | 468                  | 429 | 507 | 535 | 548 |
| Mock                                | c    | 8    | 623                                          | 615                  | 475 | 516 | 541 | 542 |
| Mock                                | c    | 9    | 563                                          | 343                  | 384 | 384 | 420 | 446 |
| Mock                                | c    | 10   | 503                                          | 359                  | 400 | 383 | 439 | 420 |
| Mock                                | c    | 11   | 612                                          | 473                  | 428 | 403 | 469 | 487 |
| Mock                                | c    | 12   | 551                                          | 384                  | 392 | 364 | 404 | 428 |
| AVERAGE                             |      |      | 517                                          | 421                  | 429 | 449 | 449 | 471 |

|           |      |      | TEER readings ( $\Omega$ x cm <sup>2</sup> ) |                      |     |     |     |     |
|-----------|------|------|----------------------------------------------|----------------------|-----|-----|-----|-----|
|           |      |      | Pre-infection                                | Hours post-infection |     |     |     |     |
| Treatment | Expt | Well | -1                                           | 1                    | 6   | 18  | 24  | 30  |
| H1N1pdm09 | a    | 1    | 427                                          | 427                  | 529 | 539 | 331 | 149 |
| H1N1pdm09 | a    | 2    | 420                                          | 521                  | 528 | 533 | 486 | 218 |
| H1N1pdm09 | a    | 3    | 401                                          | 351                  | 413 | 536 | 411 | 214 |
| H1N1pdm09 | a    | 4    | 529                                          | 502                  | 535 | 526 | 381 | 167 |
| H1N1pdm09 | a    | 5    | 566                                          | 479                  | 409 | 412 | 149 | 80  |
| H1N1pdm09 | a    | 6    | 504                                          | 612                  | 469 | 430 | 180 | 93  |
| H1N1pdm09 | a    | 7    | 540                                          | 551                  | 469 | 236 | 125 | 73  |
| H1N1pdm09 | a    | 8    | 540                                          | 592                  | 608 | 439 | 148 | 87  |
| H1N1pdm09 | a    | 9    | 599                                          | 454                  | 461 | 390 | 173 | 64  |
| H1N1pdm09 | a    | 10   | 428                                          | 344                  | 497 | 307 | 116 | 54  |
| H1N1pdm09 | a    | 11   | 571                                          | 387                  | 488 | 365 | 174 | 80  |
| H1N1pdm09 | a    | 12   | 466                                          | 450                  | 439 | 241 | 120 | 66  |
| H1N1pdm09 | b    | 1    | 444                                          | 506                  | 453 | 444 | 308 | 258 |
| H1N1pdm09 | b    | 2    | 374                                          | 314                  | 343 | 381 | 277 | 282 |
| H1N1pdm09 | b    | 3    | 482                                          | 441                  | 428 | 420 | 356 | 277 |
| H1N1pdm09 | b    | 4    | 401                                          | 390                  | 425 | 461 | 352 | 246 |
| H1N1pdm09 | b    | 5    | 518                                          | 476                  | 421 | 443 | 224 | 108 |
| H1N1pdm09 | b    | 6    | 538                                          | 455                  | 452 | 492 | 288 | 144 |
| H1N1pdm09 | b    | 7    | 483                                          | 507                  | 419 | 450 | 283 | 134 |
| H1N1pdm09 | b    | 8    | 478                                          | 504                  | 394 | 406 | 245 | 117 |
| H1N1pdm09 | b    | 9    | 565                                          | 337                  | 404 | 447 | 293 | 126 |
| H1N1pdm09 | b    | 10   | 433                                          | 421                  | 365 | 275 | 152 | 68  |
| H1N1pdm09 | b    | 11   | 563                                          | 514                  | 460 | 277 | 200 | 70  |
| H1N1pdm09 | b    | 12   | 562                                          | 486                  | 440 | 431 | 230 | 65  |
| H1N1pdm09 | c    | 1    | 507                                          | 499                  | 522 | 474 | 426 | 214 |
| H1N1pdm09 | c    | 2    | 498                                          | 442                  | 458 | 410 | 362 | 303 |
| H1N1pdm09 | c    | 3    | 510                                          | 297                  | 391 | 343 | 295 | 237 |
| H1N1pdm09 | c    | 4    | 395                                          | 337                  | 378 | 330 | 282 | 320 |
| H1N1pdm09 | c    | 5    | 508                                          | 545                  | 418 | 455 | 305 | 162 |
| H1N1pdm09 | c    | 6    | 496                                          | 459                  | 389 | 433 | 246 | 107 |
| H1N1pdm09 | c    | 7    | 489                                          | 494                  | 405 | 403 | 174 | 94  |
| H1N1pdm09 | c    | 8    | 627                                          | 412                  | 442 | 555 | 373 | 128 |
| H1N1pdm09 | c    | 9    | 569                                          | 498                  | 407 | 412 | 285 | 111 |
| H1N1pdm09 | c    | 10   | 523                                          | 366                  | 392 | 362 | 204 | 87  |
| H1N1pdm09 | c    | 11   | 593                                          | 579                  | 487 | 442 | 228 | 88  |
| H1N1pdm09 | c    | 12   | 544                                          | 538                  | 451 | 381 | 223 | 95  |
| AVERAGE   |      |      | 503                                          | 458                  | 444 | 413 | 261 | 144 |

Table S3: TEER readings ( $\Omega$  &  $\Omega \times \text{cm}^2$ ) wdNHBE cells - poly(I:C)

TEER readings ( $\Omega$ )

| MOCK      |      |      | TEER readings ( $\Omega$ ) |                      |
|-----------|------|------|----------------------------|----------------------|
|           |      |      | Pre-treatment              | Hours post-treatment |
| Treatment | Expt | Well | -24                        | 48                   |
| Mock      | 2a   | 1    | 1360                       | 1597                 |
| Mock      | 2a   | 2    | 1378                       | 1579                 |
| Mock      | 2a   | 3    | 1467                       | 1534                 |
| Mock      | 2a   | 4    | 1311                       | 1565                 |
| Mock      | 2a   | 5    | 1436                       | 1614                 |
| Mock      | 2a   | 6    | 1394                       | 1454                 |
| Mock      | 2a   | 7    | 1380                       | 1695                 |
| Mock      | 2a   | 8    | 1470                       | 1327                 |
| Mock      | 2a   | 9    | 1337                       | 1504                 |
| Mock      | 2a   | 10   | 1296                       | 1298                 |
| Mock      | 2a   | 11   | 1506                       | 1564                 |
| Mock      | 2a   | 12   | 1606                       | 1490                 |
| Mock      | 2a   | 13   | 1496                       | 1438                 |
| Mock      | 2a   | 14   | 1327                       | 1324                 |
| Mock      | 2a   | 15   | 1418                       | 1487                 |
| Mock      | 2b   | 1    | 1026                       | 1715                 |
| Mock      | 2b   | 2    | 1083                       | 1737                 |
| Mock      | 2b   | 3    | 900                        | 1543                 |
| Mock      | 2b   | 4    | 1099                       | 1600                 |
| Mock      | 2b   | 5    | 869                        | 1766                 |
| Mock      | 2b   | 6    | 1221                       | 979                  |
| Mock      | 2b   | 7    | 1218                       | 1409                 |
| Mock      | 2b   | 8    | 985                        | 1634                 |
| Mock      | 2b   | 9    | 1174                       | 1423                 |
| Mock      | 2b   | 10   | 986                        | 1353                 |
| Mock      | 2b   | 11   | 1181                       | 922                  |
| Mock      | 2b   | 12   | 1190                       | 1475                 |
| Mock      | 2b   | 13   | 1264                       | 1234                 |
| Mock      | 2b   | 14   | 1177                       | 980                  |
| Mock      | 2b   | 15   | 1137                       | 1395                 |
| Mock      | 2c   | 1    | 1357                       | 1684                 |
| Mock      | 2c   | 2    | 1462                       | 1736                 |
| Mock      | 2c   | 3    | 1156                       | 1348                 |
| Mock      | 2c   | 4    | 1039                       | 1135                 |
| Mock      | 2c   | 5    | 1049                       | 1195                 |
| Mock      | 2c   | 6    | 1111                       | 799                  |
| Mock      | 2c   | 7    | 1292                       | 1227                 |
| Mock      | 2c   | 8    | 1236                       | 1215                 |
| Mock      | 2c   | 9    | 1217                       | 1104                 |
| Mock      | 2c   | 10   | 1503                       | 785                  |
| Mock      | 2c   | 11   | 1262                       | 1340                 |
| Mock      | 2c   | 12   | 1280                       | 1363                 |
| Mock      | 2c   | 13   | 1375                       | 1191                 |
| Mock      | 2c   | 14   | 1330                       | 1530                 |
| Mock      | 2c   | 15   | 1376                       | 1279                 |
| AVERAGE   |      |      | 1261                       | 1390                 |

| 20 $\mu\text{g}$ Poly(I:C) |      |      | TEER readings ( $\Omega$ ) |                      |
|----------------------------|------|------|----------------------------|----------------------|
|                            |      |      | Pre-treatment              | Hours post-treatment |
| Treatment                  | Expt | Well | -24                        | 48                   |
| 20 $\mu\text{g}$ Poly(I:C) | 2a   | 1    | 1330                       | 539                  |
| 20 $\mu\text{g}$ Poly(I:C) | 2a   | 2    | 1441                       | 675                  |
| 20 $\mu\text{g}$ Poly(I:C) | 2a   | 3    | 1418                       | 628                  |
| 20 $\mu\text{g}$ Poly(I:C) | 2a   | 4    | 1394                       | 366                  |
| 20 $\mu\text{g}$ Poly(I:C) | 2a   | 5    | 1381                       | 799                  |
| 20 $\mu\text{g}$ Poly(I:C) | 2a   | 6    | 1350                       | 341                  |
| 20 $\mu\text{g}$ Poly(I:C) | 2a   | 7    | 1573                       | 522                  |
| 20 $\mu\text{g}$ Poly(I:C) | 2a   | 8    | 1355                       | 404                  |
| 20 $\mu\text{g}$ Poly(I:C) | 2a   | 9    | 1442                       | 401                  |
| 20 $\mu\text{g}$ Poly(I:C) | 2a   | 10   | 1349                       | 646                  |
| 20 $\mu\text{g}$ Poly(I:C) | 2b   | 1    | 1345                       | 745                  |
| 20 $\mu\text{g}$ Poly(I:C) | 2b   | 2    | 1015                       | 316                  |
| 20 $\mu\text{g}$ Poly(I:C) | 2b   | 3    | 921                        | 518                  |
| 20 $\mu\text{g}$ Poly(I:C) | 2b   | 4    | 1045                       | 497                  |
| 20 $\mu\text{g}$ Poly(I:C) | 2b   | 5    | 979                        | 458                  |
| 20 $\mu\text{g}$ Poly(I:C) | 2b   | 6    | 973                        | 239                  |
| 20 $\mu\text{g}$ Poly(I:C) | 2b   | 7    | 1014                       | 184                  |
| 20 $\mu\text{g}$ Poly(I:C) | 2b   | 8    | 1302                       | 273                  |
| 20 $\mu\text{g}$ Poly(I:C) | 2b   | 9    | 1088                       | 577                  |
| 20 $\mu\text{g}$ Poly(I:C) | 2b   | 10   | 1065                       | 536                  |
| 20 $\mu\text{g}$ Poly(I:C) | 2c   | 1    | 1158                       | 378                  |
| 20 $\mu\text{g}$ Poly(I:C) | 2c   | 2    | 1224                       | 679                  |
| 20 $\mu\text{g}$ Poly(I:C) | 2c   | 3    | 1057                       | 833                  |
| 20 $\mu\text{g}$ Poly(I:C) | 2c   | 4    | 1158                       | 518                  |
| 20 $\mu\text{g}$ Poly(I:C) | 2c   | 5    | 1167                       | 395                  |
| 20 $\mu\text{g}$ Poly(I:C) | 2c   | 6    | 1280                       | 395                  |
| 20 $\mu\text{g}$ Poly(I:C) | 2c   | 7    | 1404                       | 270                  |
| 20 $\mu\text{g}$ Poly(I:C) | 2c   | 8    | 1167                       | 471                  |
| 20 $\mu\text{g}$ Poly(I:C) | 2c   | 9    | 1519                       | 1096                 |
| 20 $\mu\text{g}$ Poly(I:C) | 2c   | 10   | 1299                       | 394                  |
| AVERAGE                    |      |      | 1240                       | 503                  |

| 30 $\mu\text{g}$ Poly(I:C) |      |      | TEER readings ( $\Omega$ ) |                      |
|----------------------------|------|------|----------------------------|----------------------|
|                            |      |      | Pre-treatment              | Hours post-treatment |
| Treatment                  | Expt | Well | -24                        | 48                   |
| 30 $\mu\text{g}$ Poly(I:C) | 2a   | 1    | 1420                       | 354                  |
| 30 $\mu\text{g}$ Poly(I:C) | 2a   | 2    | 1410                       | 281                  |
| 30 $\mu\text{g}$ Poly(I:C) | 2a   | 3    | 1277                       | 433                  |
| 30 $\mu\text{g}$ Poly(I:C) | 2a   | 4    | 1436                       | 247                  |
| 30 $\mu\text{g}$ Poly(I:C) | 2a   | 5    | 1345                       | 400                  |
| 30 $\mu\text{g}$ Poly(I:C) | 2a   | 6    | 1569                       | 292                  |
| 30 $\mu\text{g}$ Poly(I:C) | 2a   | 7    | 1547                       | 299                  |
| 30 $\mu\text{g}$ Poly(I:C) | 2a   | 8    | 1386                       | 400                  |
| 30 $\mu\text{g}$ Poly(I:C) | 2a   | 9    | 1479                       | 306                  |
| 30 $\mu\text{g}$ Poly(I:C) | 2a   | 10   | 1480                       | 303                  |
| 30 $\mu\text{g}$ Poly(I:C) | 2a   | 11   | 1430                       | 397                  |
| 30 $\mu\text{g}$ Poly(I:C) | 2a   | 12   | 1366                       | 403                  |
| 30 $\mu\text{g}$ Poly(I:C) | 2a   | 13   | 1478                       | 320                  |
| 30 $\mu\text{g}$ Poly(I:C) | 2a   | 14   | 1528                       | 340                  |
| 30 $\mu\text{g}$ Poly(I:C) | 2a   | 15   | 1507                       | 329                  |
| 30 $\mu\text{g}$ Poly(I:C) | 2b   | 1    | 1423                       | 221                  |
| 30 $\mu\text{g}$ Poly(I:C) | 2b   | 2    | 1398                       | 444                  |
| 30 $\mu\text{g}$ Poly(I:C) | 2b   | 3    | 1133                       | 296                  |
| 30 $\mu\text{g}$ Poly(I:C) | 2b   | 4    | 1265                       | 433                  |
| 30 $\mu\text{g}$ Poly(I:C) | 2b   | 5    | 1008                       | 319                  |
| 30 $\mu\text{g}$ Poly(I:C) | 2b   | 6    | 1190                       | 287                  |
| 30 $\mu\text{g}$ Poly(I:C) | 2b   | 7    | 1153                       | 279                  |
| 30 $\mu\text{g}$ Poly(I:C) | 2b   | 8    | 946                        | 206                  |
| 30 $\mu\text{g}$ Poly(I:C) | 2b   | 9    | 1246                       | 275                  |
| 30 $\mu\text{g}$ Poly(I:C) | 2b   | 10   | 1098                       | 266                  |
| 30 $\mu\text{g}$ Poly(I:C) | 2b   | 11   | 1303                       | 380                  |
| 30 $\mu\text{g}$ Poly(I:C) | 2b   | 12   | 1248                       | 266                  |
| 30 $\mu\text{g}$ Poly(I:C) | 2b   | 13   | 1296                       | 445                  |
| 30 $\mu\text{g}$ Poly(I:C) | 2b   | 14   | 1186                       | 249                  |
| 30 $\mu\text{g}$ Poly(I:C) | 2b   | 15   | 1209                       | 246                  |
| 30 $\mu\text{g}$ Poly(I:C) | 2c   | 1    | 1333                       | 468                  |
| 30 $\mu\text{g}$ Poly(I:C) | 2c   | 2    | 1555                       | 313                  |
| 30 $\mu\text{g}$ Poly(I:C) | 2c   | 3    | 1432                       | 269                  |
| 30 $\mu\text{g}$ Poly(I:C) | 2c   | 4    | 1148                       | 368                  |
| 30 $\mu\text{g}$ Poly(I:C) | 2c   | 5    | 1191                       | 906                  |
| 30 $\mu\text{g}$ Poly(I:C) | 2c   | 6    | 1237                       | 293                  |
| 30 $\mu\text{g}$ Poly(I:C) | 2c   | 7    | 1245                       | 333                  |
| 30 $\mu\text{g}$ Poly(I:C) | 2c   | 8    | 1350                       | 233                  |
| 30 $\mu\text{g}$ Poly(I:C) | 2c   | 9    | 1522                       | 272                  |
| 30 $\mu\text{g}$ Poly(I:C) | 2c   | 10   | 1156                       | 389                  |
| 30 $\mu\text{g}$ Poly(I:C) | 2c   | 11   | 1376                       | 165                  |
| 30 $\mu\text{g}$ Poly(I:C) | 2c   | 12   | 1390                       | 287                  |
| 30 $\mu\text{g}$ Poly(I:C) | 2c   | 13   | 1184                       | 342                  |
| 30 $\mu\text{g}$ Poly(I:C) | 2c   | 14   | 1602                       | 391                  |
| 30 $\mu\text{g}$ Poly(I:C) | 2c   | 15   | 1294                       | 125                  |
| AVERAGE                    |      |      | 1328                       | 330                  |

TEER readings ( $\Omega \times \text{cm}^2$ )

| MOCK      |      |      | TEER readings ( $\Omega \times \text{cm}^2$ ) |                      |
|-----------|------|------|-----------------------------------------------|----------------------|
|           |      |      | Pre-treatment                                 | Hours post-treatment |
| Treatment | Expt | Well | -24                                           | 48                   |
| Mock      | 2a   | 1    | 449                                           | 527                  |
| Mock      | 2a   | 2    | 455                                           | 521                  |
| Mock      | 2a   | 3    | 484                                           | 506                  |
| Mock      | 2a   | 4    | 433                                           | 516                  |
| Mock      | 2a   | 5    | 474                                           | 533                  |
| Mock      | 2a   | 6    | 460                                           | 480                  |
| Mock      | 2a   | 7    | 455                                           | 559                  |
| Mock      | 2a   | 8    | 485                                           | 438                  |
| Mock      | 2a   | 9    | 441                                           | 496                  |
| Mock      | 2a   | 10   | 428                                           | 428                  |
| Mock      | 2a   | 11   | 497                                           | 516                  |
| Mock      | 2a   | 12   | 530                                           | 492                  |
| Mock      | 2a   | 13   | 494                                           | 475                  |
| Mock      | 2a   | 14   | 438                                           | 437                  |
| Mock      | 2a   | 15   | 468                                           | 491                  |
| Mock      | 2b   | 1    | 339                                           | 566                  |
| Mock      | 2b   | 2    | 357                                           | 573                  |
| Mock      | 2b   | 3    | 297                                           | 509                  |
| Mock      | 2b   | 4    | 363                                           | 528                  |
| Mock      | 2b   | 5    | 287                                           | 583                  |
| Mock      | 2b   | 6    | 403                                           | 323                  |
| Mock      | 2b   | 7    | 402                                           | 465                  |
| Mock      | 2b   | 8    | 325                                           | 539                  |
| Mock      | 2b   | 9    | 387                                           | 470                  |
| Mock      | 2b   | 10   | 325                                           | 446                  |
| Mock      | 2b   | 11   | 390                                           | 304                  |
| Mock      | 2b   | 12   | 393                                           | 487                  |
| Mock      | 2b   | 13   | 417                                           | 407                  |
| Mock      | 2b   | 14   | 388                                           | 323                  |
| Mock      | 2b   | 15   | 375                                           | 460                  |
| Mock      | 2c   | 1    | 448                                           | 556                  |
| Mock      | 2c   | 2    | 482                                           | 573                  |
| Mock      | 2c   | 3    | 381                                           | 445                  |
| Mock      | 2c   | 4    | 343                                           | 375                  |
| Mock      | 2c   | 5    | 346                                           | 394                  |
| Mock      | 2c   | 6    | 367                                           | 264                  |
| Mock      | 2c   | 7    | 426                                           | 405                  |
| Mock      | 2c   | 8    | 408                                           | 401                  |
| Mock      | 2c   | 9    | 402                                           | 364                  |
| Mock      | 2c   | 10   | 496                                           | 259                  |
| Mock      | 2c   | 11   | 416                                           | 442                  |
| Mock      | 2c   | 12   | 422                                           | 450                  |
| Mock      | 2c   | 13   | 454                                           | 393                  |
| Mock      | 2c   | 14   | 439                                           | 505                  |
| Mock      | 2c   | 15   | 454                                           | 422                  |
| AVERAGE   |      |      | 416                                           | 459                  |

| 20 $\mu\text{g}$ Poly(I:C) |      |      | TEER readings ( $\Omega \times \text{cm}^2$ ) |                      |
|----------------------------|------|------|-----------------------------------------------|----------------------|
|                            |      |      | Pre-treatment                                 | Hours post-treatment |
| Treatment                  | Expt | Well | -24                                           | 48                   |
| 20 $\mu\text{g}$ Poly(I:C) | 2a   | 1    | 439                                           | 178                  |
| 20 $\mu\text{g}$ Poly(I:C) | 2a   | 2    | 476                                           | 223                  |
| 20 $\mu\text{g}$ Poly(I:C) | 2a   | 3    | 468                                           | 207                  |
| 20 $\mu\text{g}$ Poly(I:C) | 2a   | 4    | 460                                           | 121                  |
| 20 $\mu\text{g}$ Poly(I:C) | 2a   | 5    | 456                                           | 264                  |
| 20 $\mu\text{g}$ Poly(I:C) | 2a   | 6    | 446                                           | 113                  |
| 20 $\mu\text{g}$ Poly(I:C) | 2a   | 7    | 519                                           | 172                  |
| 20 $\mu\text{g}$ Poly(I:C) | 2a   | 8    | 447                                           | 133                  |
| 20 $\mu\text{g}$ Poly(I:C) | 2a   | 9    | 476                                           | 132                  |
| 20 $\mu\text{g}$ Poly(I:C) | 2a   | 10   | 445                                           | 213                  |
| 20 $\mu\text{g}$ Poly(I:C) | 2b   | 1    | 444                                           | 246                  |
| 20 $\mu\text{g}$ Poly(I:C) | 2b   | 2    | 335                                           | 104                  |
| 20 $\mu\text{g}$ Poly(I:C) | 2b   | 3    | 304                                           | 171                  |
| 20 $\mu\text{g}$ Poly(I:C) | 2b   | 4    | 345                                           | 164                  |
| 20 $\mu\text{g}$ Poly(I:C) | 2b   | 5    | 323                                           | 151                  |
| 20 $\mu\text{g}$ Poly(I:C) | 2b   | 6    | 321                                           | 79                   |
| 20 $\mu\text{g}$ Poly(I:C) | 2b   | 7    | 335                                           | 61                   |
| 20 $\mu\text{g}$ Poly(I:C) | 2b   | 8    | 430                                           | 90                   |
| 20 $\mu\text{g}$ Poly(I:C) | 2b   | 9    | 359                                           | 190                  |
| 20 $\mu\text{g}$ Poly(I:C) | 2b   | 10   | 351                                           | 177                  |
| 20 $\mu\text{g}$ Poly(I:C) | 2c   | 1    | 382                                           | 125                  |
| 20 $\mu\text{g}$ Poly(I:C) | 2c   | 2    | 404                                           | 224                  |
| 20 $\mu\text{g}$ Poly(I:C) | 2c   | 3    | 349                                           | 275                  |
| 20 $\mu\text{g}$ Poly(I:C) | 2c   | 4    | 382                                           | 171                  |
| 20 $\mu\text{g}$ Poly(I:C) | 2c   | 5    | 385                                           | 130                  |
| 20 $\mu\text{g}$ Poly(I:C) | 2c   | 6    | 422                                           | 130                  |
| 20 $\mu\text{g}$ Poly(I:C) | 2c   | 7    | 463                                           | 89                   |
| 20 $\mu\text{g}$ Poly(I:C) | 2c   | 8    | 385                                           | 155                  |
| 20 $\mu\text{g}$ Poly(I:C) | 2c   | 9    | 501                                           | 362                  |
| 20 $\mu\text{g}$ Poly(I:C) | 2c   | 10   | 429                                           | 130                  |
| AVERAGE                    |      |      | 409                                           | 166                  |

| 30 $\mu\text{g}$ Poly(I:C)        |      |      | TEER readings ( $\Omega \times \text{cm}^2$ ) |                      |
|-----------------------------------|------|------|-----------------------------------------------|----------------------|
| Transwell area 0.33 $\text{cm}^2$ |      |      | Pre-treatment                                 | Hours post-treatment |
| Treatment                         | Expt | Well | -24                                           | 48                   |
| Mock                              | 2a   | 1    | 469                                           | 117                  |
| Mock                              | 2a   | 2    | 465                                           | 93                   |
| Mock                              | 2a   | 3    | 421                                           | 143                  |
| Mock                              | 2a   | 4    | 474                                           | 82                   |
| Mock                              | 2a   | 5    | 444                                           | 132                  |
| Mock                              | 2a   | 6    | 518                                           | 96                   |
| Mock                              | 2a   | 7    | 511                                           | 99                   |
| Mock                              | 2a   | 8    | 457                                           | 132                  |
| Mock                              | 2a   | 9    | 488                                           | 101                  |
| Mock                              | 2a   | 10   | 488                                           | 100                  |
| Mock                              | 2a   | 11   | 472                                           | 131                  |
| Mock                              | 2a   | 12   | 451                                           | 133                  |
| Mock                              | 2a   | 13   | 488                                           | 106                  |
| Mock                              | 2a   | 14   | 504                                           | 112                  |
| Mock                              | 2a   | 15   | 497                                           | 109                  |
| Mock                              | 2b   | 1    | 470                                           | 73                   |
| Mock                              | 2b   | 2    | 461                                           | 147                  |
| Mock                              | 2b   | 3    | 374                                           | 98                   |
| Mock                              | 2b   | 4    | 417                                           | 143                  |
| Mock                              | 2b   | 5    | 333                                           | 105                  |
| Mock                              | 2b   | 6    | 393                                           | 95                   |
| Mock                              | 2b   | 7    | 380                                           | 92                   |
| Mock                              | 2b   | 8    | 312                                           | 68                   |
| Mock                              | 2b   | 9    | 411                                           | 91                   |
| Mock                              | 2b   | 10   | 362                                           | 88                   |
| Mock                              | 2b   | 11   | 430                                           | 125                  |
| Mock                              | 2b   | 12   | 412                                           | 88                   |
| Mock                              | 2b   | 13   | 428                                           | 147                  |
| Mock                              | 2b   | 14   | 391                                           | 82                   |
| Mock                              | 2b   | 15   | 399                                           | 81                   |
| Mock                              | 2c   | 1    | 440                                           | 154                  |
| Mock                              | 2c   | 2    | 513                                           | 103                  |
| Mock                              | 2c   | 3    | 473                                           | 89                   |
| Mock                              | 2c   | 4    | 379                                           | 121                  |
| Mock                              | 2c   | 5    | 393                                           | 299                  |
| Mock                              | 2c   | 6    | 408                                           | 97                   |
| Mock                              | 2c   | 7    | 411                                           | 110                  |
| Mock                              | 2c   | 8    | 446                                           | 77                   |
| Mock                              | 2c   | 9    | 502                                           | 90                   |
| Mock                              | 2c   | 10   | 381                                           | 128                  |
| Mock                              | 2c   | 11   | 454                                           | 54                   |
| Mock                              | 2c   | 12   | 459                                           | 95                   |
| Mock                              | 2c   | 13   | 391                                           | 113                  |
| Mock                              | 2c   | 14   | 529                                           | 129                  |
| Mock                              | 2c   | 15   | 427                                           | 41                   |
| AVERAGE                           |      |      | 438                                           | 109                  |



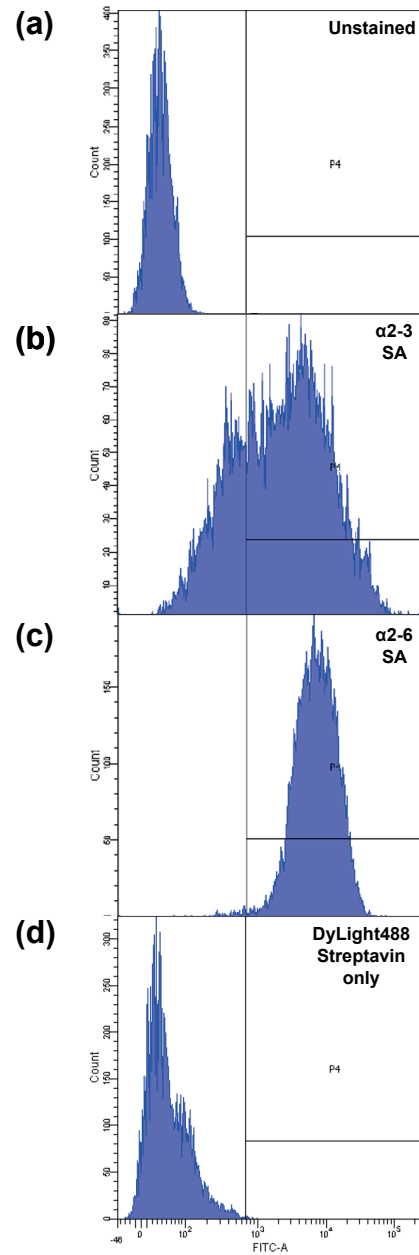

**Figure S2. FACS analysis of  $\alpha$ 2-3- and  $\alpha$ 2-6-linked sialic acids on the surface of wdNHBE cells**

NHBEs were differentiated at the air liquid interface for more than four weeks and cell surface  $\alpha$ 2-3- and  $\alpha$ 2-6-linked sialic acids bound by biotinylated *Maackia amurensis* agglutinin II (*MAA* II) and *Sambucus nigra* agglutinin I (*SNA* I) respectively were determined by FACS. Agglutinins were bound to DyLight 488 streptavidin, sorted and analysed. **(a)** Unstained wdNHBE cells were used as a negative control. **(b)** Cell-surface  $\alpha$ 2-3-linked sialic acids detected by *MAA* II were present on an average of 73.6% of wdNHBEs. **(c)** In contrast, 99.2% of airlifted NHBEs had  $\alpha$ 2-6-linked sialic acids on the cell surface as detected by *SNA* I binding. As for unstained wdNHBEs, **(d)** the DyLight 488 streptavidin-only treated cells indicated that there was no non-specific streptavidin binding.

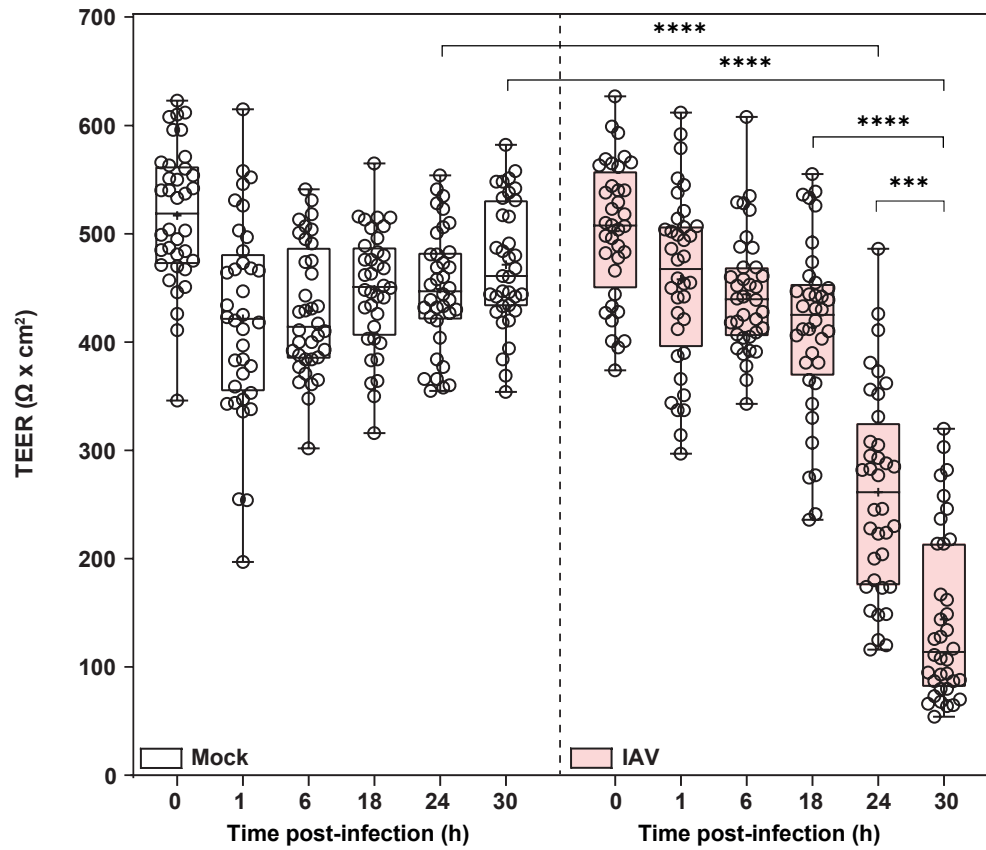

**Figure S3. Transepithelial electrical resistance (TEER) readings for three independent experiments of Mock vs IAV H1N1pdm09 inoculated wdnHBE cells**

wdnHBEs were inoculated with H1N1pdm09 (MO1 1) and barrier integrity (TEER,  $\Omega \times \text{cm}^2$ ) compared to mock-inoculated cells pre-infection and 1, 6, 18, 24 and 30 h post-infection. At each timepoint, n=36 biological replicates for IAV and mock treatments were measured, apart from the 30 h mock treatment, n=35. Data are presented as box and whisker plots which show the mean (+), median, interquartile range and maximum and minimum values. The ends of each box represent the upper and lower quartiles, the horizontal line within the box indicates the median value and error bars show the minimum and maximum values. Individual values are depicted by open circles. Statistical significance is indicated: \*\*\*, p<0.001; \*\*\*\*, p<0.0001.

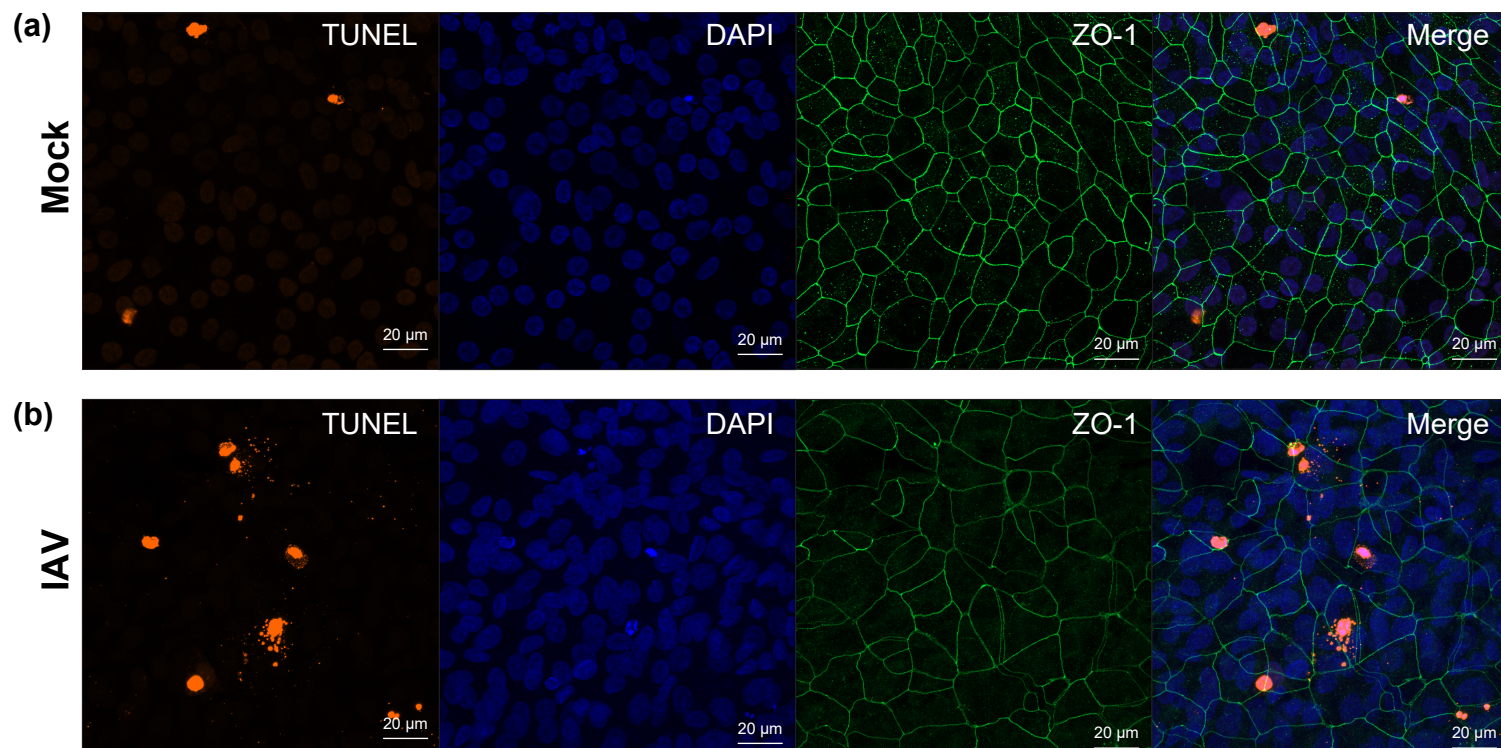

#### Figure S4. Apoptosis in wNHBE cells infected with pandemic IAV H1N1pdm09

Airlifted NHBEs were inoculated with (a) ALI media alone (Mock) or with (b) IAV H1N1pdm09 added to the apical surface of cells differentiated on transwells. At 30 h post-infection, cells were fixed with 4% PFA, and TUNEL stained (orange, apoptotic cells), ZO-1 (green, tight junction protein 1, perijunctional belt) and DAPI (nuclei, blue). TUNEL staining shows the increased apoptosis characterised by blebbing and cell fragmentation in (b) IAV-infected versus (a) mock-inoculated cells. DAPI nuclear staining also shows the breakdown of cell nuclei undergoing programmed cell death, while ZO-1 staining suggests that IAV-infected cells are distended compared to mock-treated cells. Merge of TUNEL, ZO-1 and DAPI for (a) mock and (b) H1N1pdm09-infected cells. Maximum intensity projections of *en face* Z-stacks, 21 slices (10 μm) captured by confocal microscopy using a 40x oil immersion objective. A 20 μm scale bar indicates cell size.

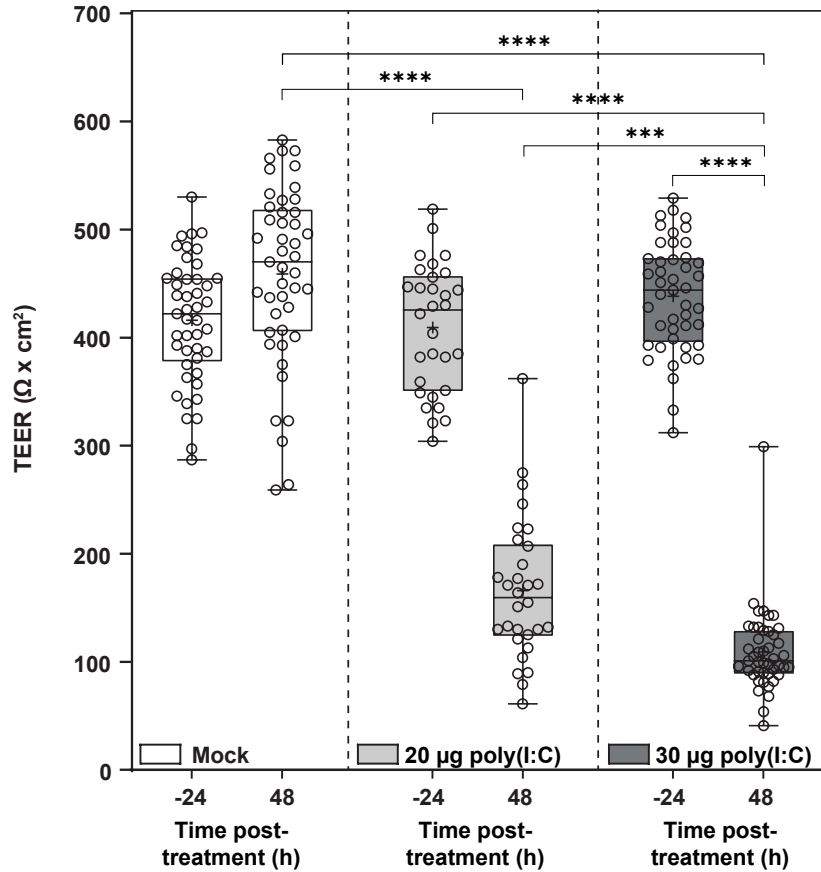

**Figure S5. Transepithelial electrical resistance (TEER) readings for three independent experiments of wdNHBE cells treated with 20  $\mu\text{g}$  & 30  $\mu\text{g}$  poly(I:C) vs mock-treated cells**

wdNHBEs treated with (20  $\mu\text{g}$  or 30  $\mu\text{g}$ ) poly(I:C) for 24 h were assayed 48 h post-treatment and barrier integrity (TEER,  $\Omega \times \text{cm}^2$ ) compared to mock (ALI media)-treated cells. For each timepoint  $n=45$  biological replicates for mock;  $n=30$  for 20  $\mu\text{g}$  poly(I:C) and  $n=45$  replicates for 30  $\mu\text{g}$  poly(I:C). Data are presented as box and whisker plots which show the mean (+), median, interquartile range and maximum and minimum values. The ends of each box represent the upper and lower quartiles, the horizontal line within the box indicates the median value and error bars show the minimum and maximum values. Individual values are depicted by open circles. Statistical significance is indicated: \*\*\*,  $p < 0.001$ ; \*\*\*\*,  $p < 0.0001$ .



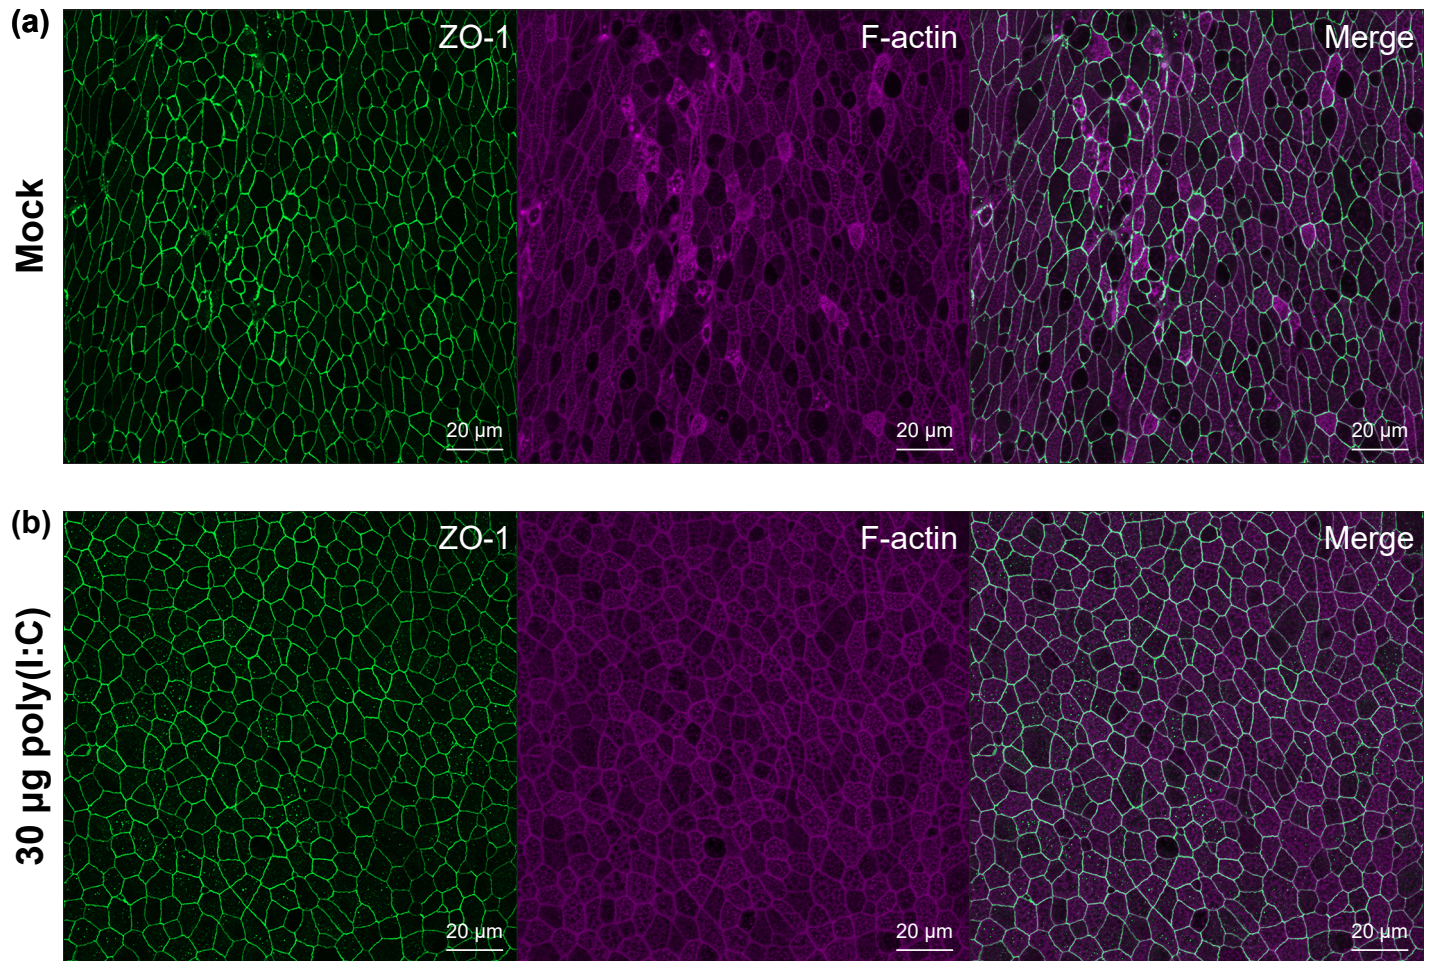

**Figure S6. Immunofluorescence assays of poly(I:C)-treated wdNHBE cells**

Airlifted NHBEs were treated with (a) ALI media alone (Mock) or (b) 30 µg poly(I:C) diluted in ALI media added to the apical surface of cells differentiated on transwells. After a 24 h incubation, the supernatant was removed from the apical surface and the cells incubated at the air liquid interface for a further 48 h at 37°C/5% CO<sub>2</sub>. Representative images of cells fixed with 4% PFA and stained with ZO-1 (green) and phalloidin (F-actin, pink) are shown. ZO-1 formed an intact perijunctional belt around each cell in both the (a) Mock and (b) poly(I:C)-treated cells. Similarly, the cytoskeleton (F-actin filaments) appeared intact in both the mock and poly(I:C)-treated cells. Merge of ZO-1 and F-actin for (a) mock and (b) 30 µg poly(I:C)-treated cells. MAXimum intensity projections of *en face* Z-stacks, 22 slices (10.5 µm) imaged by confocal microscopy using a 40x oil immersion objective. A 20 µm scale bar indicates cell size.

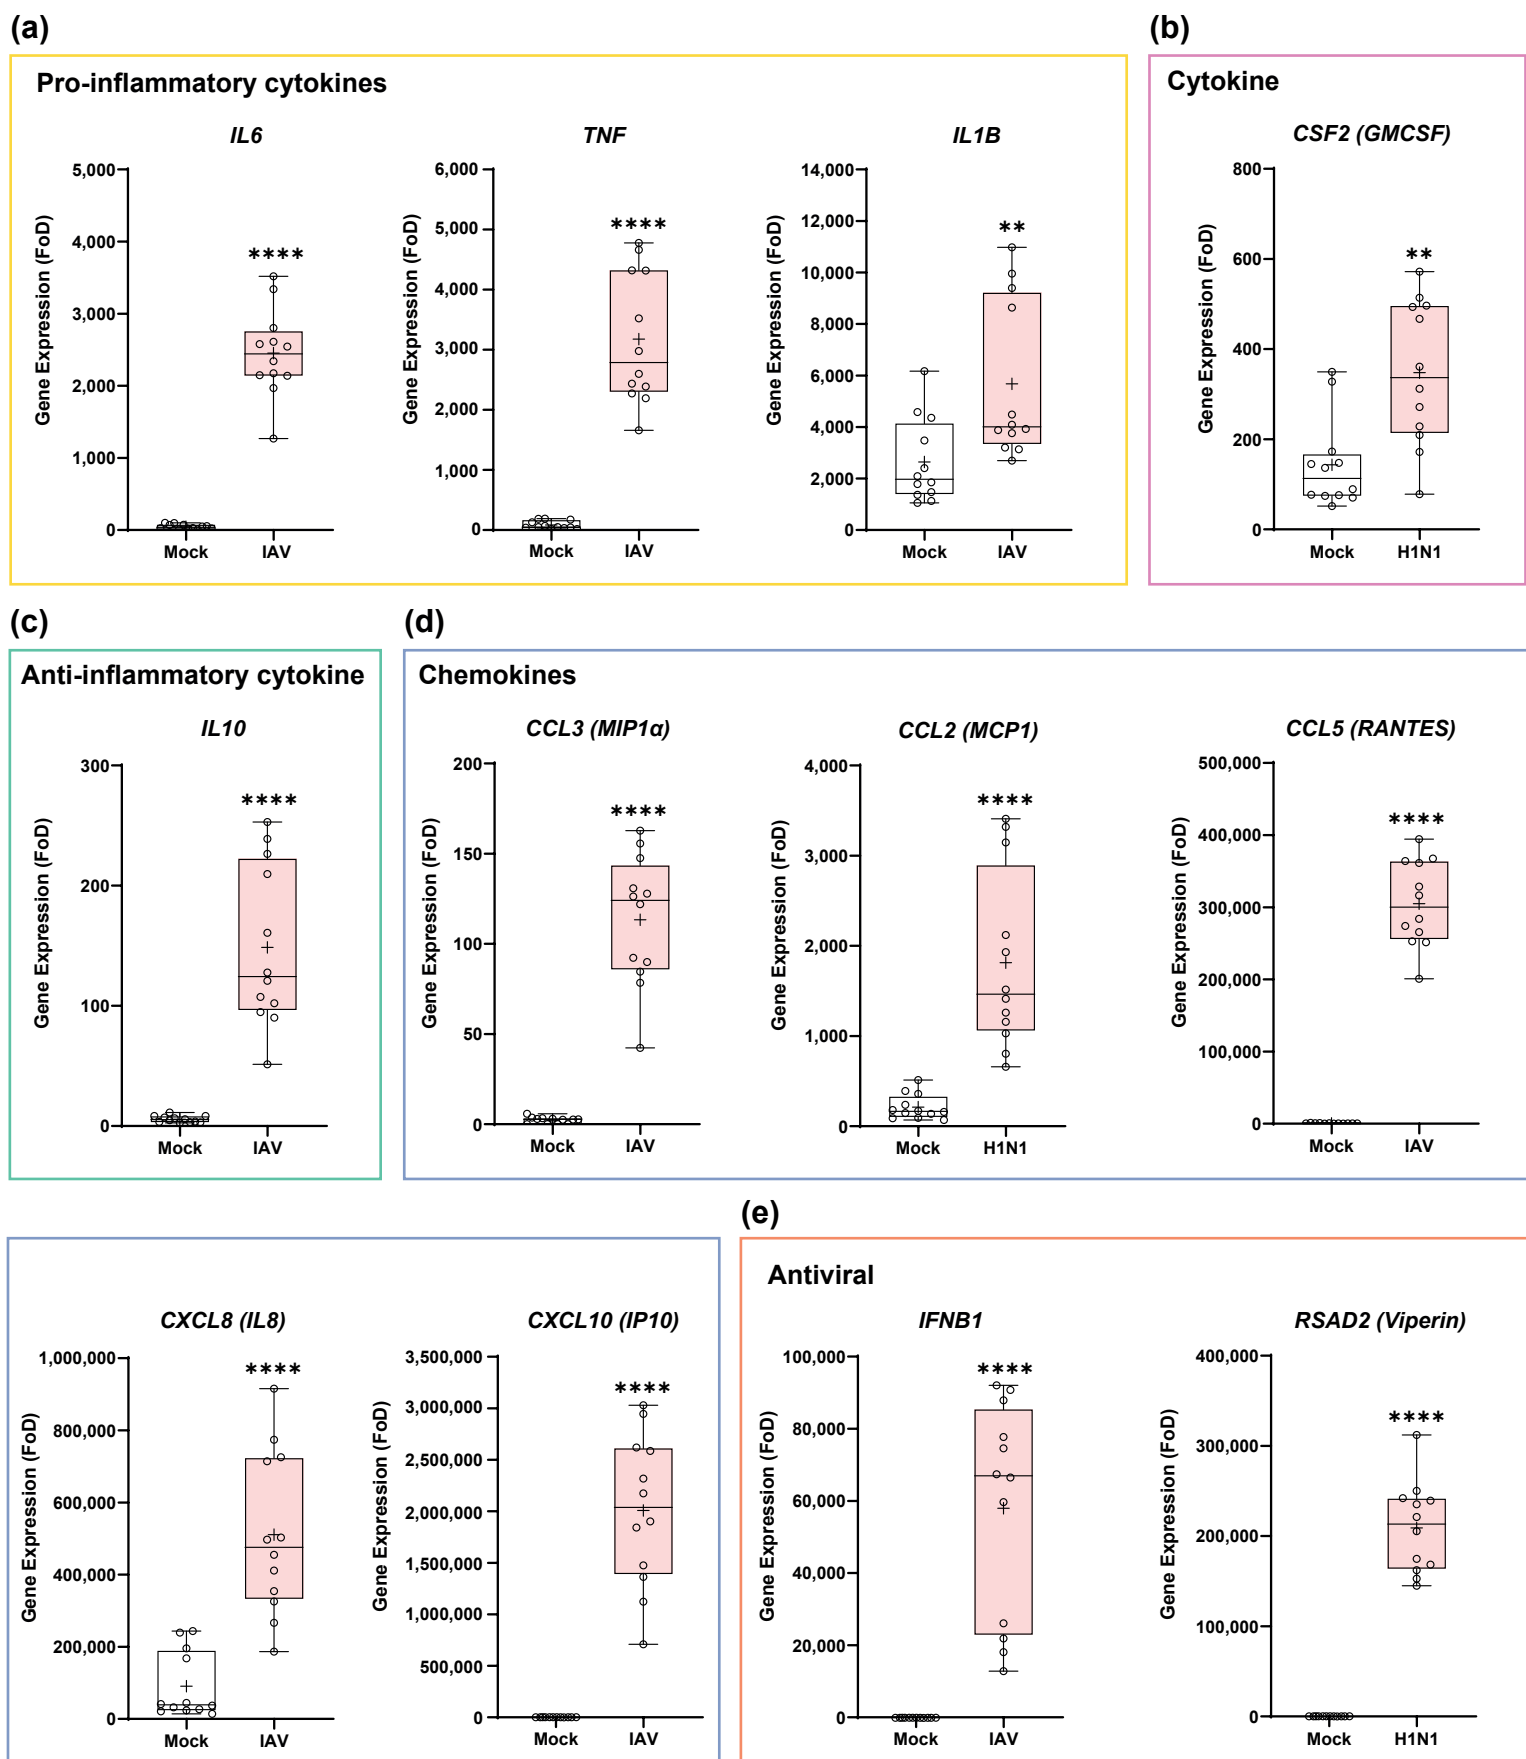

**Figure S7. Expression of cytokines, chemokines & antiviral genes in wdNHBE cells in response to pandemic influenza infection.** Gene expression in mock vs IAV H1N1pdm09-inoculated cells was determined 30 h post-inoculation by RT-qPCR. Expression was normalized to GAPDH and expressed as fold over detectable (FoD), with a minimum level detectable of 40 cycles (a) Pro-inflammatory cytokines: *IL6*, *TNF*, *IL1B*; (b) Cytokine: *CSF2 (GMCSF)*; (c) Anti-inflammatory cytokine: *IL10*; (d) Chemokines: *CCL3 (MIP1 $\alpha$ )*, *CCL2 (MCP1)*, *CCL5 (RANTES)*, *CXCL8 (IL8)*, *CXCL10 (IP10)*; (e) Antivirals: *IFNB1*, *RSAD2 (viperin)*. Data from three independent experiments was pooled, analyzed by unpaired t-tests and expressed as mean  $\pm$  SEM. Statistical significance of the expression of each gene for Mock (n=12) versus IAV-infected cells (n=12) was determined by unpaired t-tests. ns, not significant; \*\*, p<0.01; \*\*\*\*, p<0.0001.

Table S4: Gene copy numbers for IAV H1N1pdm09 vs mock-infected wdNHBE cells

| Expt. | Treat. | Well no. | Gene   | Copy No. | Expt. | Treat. | Well no. | Gene | Copy No.  | Expt. | Treat. | Well no. | Gene | Copy No. | Expt. | Treat. | Well no. | Gene  | Copy No.  | Expt. | Treat. | Well no. | Gene  | Copy No.  | Expt. | Treat. | Well no. | Gene   | Copy No.   | Expt. | Treat. | Well no. | Gene | Copy No. | Expt. | Treat. | Well no. | Gene | Copy No. |
|-------|--------|----------|--------|----------|-------|--------|----------|------|-----------|-------|--------|----------|------|----------|-------|--------|----------|-------|-----------|-------|--------|----------|-------|-----------|-------|--------|----------|--------|------------|-------|--------|----------|------|----------|-------|--------|----------|------|----------|
| a     | Mock   | 1        | MUC5AC | 634.65   | a     | Mock   | 1        | CCL5 | 427.77    | a     | Mock   | 1        | IL10 | 3.39     | a     | Mock   | 1        | IFNB1 | 11.88     | a     | Mock   | 1        | CXCL8 | 14129.17  | a     | Mock   | 1        | CXCL10 | 59.92      | a     | Mock   | 1        | CCL2 | 87.58    |       |        |          |      |          |
| a     | Mock   | 2        | MUC5AC | 291.93   | a     | Mock   | 2        | CCL5 | 416.07    | a     | Mock   | 2        | IL10 | 3.25     | a     | Mock   | 2        | IFNB1 | 9.72      | a     | Mock   | 2        | CXCL8 | 21003.84  | a     | Mock   | 2        | CXCL10 | 77.50      | a     | Mock   | 2        | CCL2 | 180.34   |       |        |          |      |          |
| a     | Mock   | 3        | MUC5AC | 765.92   | a     | Mock   | 3        | CCL5 | 255.78    | a     | Mock   | 3        | IL10 | 3.82     | a     | Mock   | 3        | IFNB1 | 22.54     | a     | Mock   | 3        | CXCL8 | 26975.43  | a     | Mock   | 3        | CXCL10 | 57.41      | a     | Mock   | 3        | CCL2 | 138.28   |       |        |          |      |          |
| a     | Mock   | 4        | MUC5AC | 2892.23  | a     | Mock   | 4        | CCL5 | 545.37    | a     | Mock   | 4        | IL10 | 2.58     | a     | Mock   | 4        | IFNB1 | 11.92     | a     | Mock   | 4        | CXCL8 | 23825.00  | a     | Mock   | 4        | CXCL10 | 95.63      | a     | Mock   | 4        | CCL2 | 170.70   |       |        |          |      |          |
| a     | IAV    | 5        | MUC5AC | 1244.69  | a     | IAV    | 5        | CCL5 | 249786.26 | a     | IAV    | 5        | IL10 | 102.33   | a     | IAV    | 5        | IFNB1 | 91071.38  | a     | IAV    | 5        | CXCL8 | 327128.53 | a     | IAV    | 5        | CXCL10 | 1368903.21 | a     | IAV    | 5        | CCL2 | 806.32   |       |        |          |      |          |
| a     | IAV    | 6        | MUC5AC | 911.98   | a     | IAV    | 6        | CCL5 | 267323.80 | a     | IAV    | 6        | IL10 | 90.23    | a     | IAV    | 6        | IFNB1 | 67807.74  | a     | IAV    | 6        | CXCL8 | 268193.68 | a     | IAV    | 6        | CXCL10 | 1131700.42 | a     | IAV    | 6        | CCL2 | 1417.10  |       |        |          |      |          |
| a     | IAV    | 7        | MUC5AC | 1043.07  | a     | IAV    | 7        | CCL5 | 285345.39 | a     | IAV    | 7        | IL10 | 94.90    | a     | IAV    | 7        | IFNB1 | 88319.09  | a     | IAV    | 7        | CXCL8 | 356166.99 | a     | IAV    | 7        | CXCL10 | 1486557.38 | a     | IAV    | 7        | CCL2 | 1162.54  |       |        |          |      |          |
| a     | IAV    | 8        | MUC5AC | 1147.75  | a     | IAV    | 8        | CCL5 | 202287.31 | a     | IAV    | 8        | IL10 | 51.33    | a     | IAV    | 8        | IFNB1 | 78070.26  | a     | IAV    | 8        | CXCL8 | 187140.43 | a     | IAV    | 8        | CXCL10 | 714472.46  | a     | IAV    | 8        | CCL2 | 661.78   |       |        |          |      |          |
| b     | Mock   | 1        | MUC5AC | 1649.40  | b     | Mock   | 1        | CCL5 | 379.02    | b     | Mock   | 1        | IL10 | 5.72     | b     | Mock   | 1        | IFNB1 | 14.49     | b     | Mock   | 1        | CXCL8 | 169189.81 | b     | Mock   | 1        | CXCL10 | 270.53     | b     | Mock   | 1        | CCL2 | 238.10   |       |        |          |      |          |
| b     | Mock   | 2        | MUC5AC | 689.80   | b     | Mock   | 2        | CCL5 | 1098.89   | b     | Mock   | 2        | IL10 | 11.23    | b     | Mock   | 2        | IFNB1 | 7.84      | b     | Mock   | 2        | CXCL8 | 240617.22 | b     | Mock   | 2        | CXCL10 | 453.13     | b     | Mock   | 2        | CCL2 | 513.77   |       |        |          |      |          |
| b     | Mock   | 3        | MUC5AC | 3209.18  | b     | Mock   | 3        | CCL5 | 318.67    | b     | Mock   | 3        | IL10 | 7.14     | b     | Mock   | 3        | IFNB1 | 14.48     | b     | Mock   | 3        | CXCL8 | 196054.36 | b     | Mock   | 3        | CXCL10 | 321.04     | b     | Mock   | 3        | CCL2 | 358.13   |       |        |          |      |          |
| b     | Mock   | 4        | MUC5AC | 1765.19  | b     | Mock   | 4        | CCL5 | 894.99    | b     | Mock   | 4        | IL10 | 8.46     | b     | Mock   | 4        | IFNB1 | 17.12     | b     | Mock   | 4        | CXCL8 | 245103.26 | b     | Mock   | 4        | CXCL10 | 178.72     | b     | Mock   | 4        | CCL2 | 391.87   |       |        |          |      |          |
| b     | IAV    | 5        | MUC5AC | 1513.92  | b     | IAV    | 5        | CCL5 | 329619.82 | b     | IAV    | 5        | IL10 | 238.85   | b     | IAV    | 5        | IFNB1 | 92572.61  | b     | IAV    | 5        | CXCL8 | 921104.99 | b     | IAV    | 5        | CXCL10 | 2967048.18 | b     | IAV    | 5        | CCL2 | 3327.28  |       |        |          |      |          |
| b     | IAV    | 6        | MUC5AC | 1635.22  | b     | IAV    | 6        | CCL5 | 365539.40 | b     | IAV    | 6        | IL10 | 210.29   | b     | IAV    | 6        | IFNB1 | 74904.71  | b     | IAV    | 6        | CXCL8 | 718278.51 | b     | IAV    | 6        | CXCL10 | 2603871.08 | b     | IAV    | 6        | CCL2 | 1521.17  |       |        |          |      |          |
| b     | IAV    | 7        | MUC5AC | 2140.90  | b     | IAV    | 7        | CCL5 | 397136.79 | b     | IAV    | 7        | IL10 | 252.88   | b     | IAV    | 7        | IFNB1 | 59998.07  | b     | IAV    | 7        | CXCL8 | 779639.21 | b     | IAV    | 7        | CXCL10 | 3055053.89 | b     | IAV    | 7        | CCL2 | 3421.91  |       |        |          |      |          |
| b     | IAV    | 8        | MUC5AC | 2011.30  | b     | IAV    | 8        | CCL5 | 318879.40 | b     | IAV    | 8        | IL10 | 160.97   | b     | IAV    | 8        | IFNB1 | 66825.58  | b     | IAV    | 8        | CXCL8 | 730537.26 | b     | IAV    | 8        | CXCL10 | 2640456.49 | b     | IAV    | 8        | CCL2 | 2129.87  |       |        |          |      |          |
| c     | Mock   | 1        | MUC5AC | 1567.64  | c     | Mock   | 1        | CCL5 | 113.93    | c     | Mock   | 1        | IL10 | 8.43     | c     | Mock   | 1        | IFNB1 | 4.34      | c     | Mock   | 1        | CXCL8 | 37066.72  | c     | Mock   | 1        | CXCL10 | 49.12      | c     | Mock   | 1        | CCL2 | 69.54    |       |        |          |      |          |
| c     | Mock   | 2        | MUC5AC | 1081.53  | c     | Mock   | 2        | CCL5 | 579.43    | c     | Mock   | 2        | IL10 | 4.92     | c     | Mock   | 2        | IFNB1 | 1.88      | c     | Mock   | 2        | CXCL8 | 32507.44  | c     | Mock   | 2        | CXCL10 | 64.60      | c     | Mock   | 2        | CCL2 | 92.23    |       |        |          |      |          |
| c     | Mock   | 3        | MUC5AC | 2144.13  | c     | Mock   | 3        | CCL5 | 98.25     | c     | Mock   | 3        | IL10 | 3.07     | c     | Mock   | 3        | IFNB1 | 6.52      | c     | Mock   | 3        | CXCL8 | 44707.62  | c     | Mock   | 3        | CXCL10 | 69.86      | c     | Mock   | 3        | CCL2 | 145.96   |       |        |          |      |          |
| c     | Mock   | 4        | MUC5AC | 1949.28  | c     | Mock   | 4        | CCL5 | 412.79    | c     | Mock   | 4        | IL10 | 6.41     | c     | Mock   | 4        | IFNB1 | 3.14      | c     | Mock   | 4        | CXCL8 | 41618.12  | c     | Mock   | 4        | CXCL10 | 120.09     | c     | Mock   | 4        | CCL2 | 158.16   |       |        |          |      |          |
| c     | IAV    | 5        | MUC5AC | 1035.72  | c     | IAV    | 5        | CCL5 | 363748.94 | c     | IAV    | 5        | IL10 | 120.89   | c     | IAV    | 5        | IFNB1 | 18144.24  | c     | IAV    | 5        | CXCL8 | 506186.89 | c     | IAV    | 5        | CXCL10 | 2191444.98 | c     | IAV    | 5        | CCL2 | 1033.03  |       |        |          |      |          |
| c     | IAV    | 6        | MUC5AC | 4695.41  | c     | IAV    | 6        | CCL5 | 370257.65 | c     | IAV    | 6        | IL10 | 226.95   | c     | IAV    | 6        | IFNB1 | 21976.53  | c     | IAV    | 6        | CXCL8 | 457833.51 | c     | IAV    | 6        | CXCL10 | 2335840.71 | c     | IAV    | 6        | CCL2 | 3160.51  |       |        |          |      |          |
| c     | IAV    | 7        | MUC5AC | 1375.14  | c     | IAV    | 7        | CCL5 | 254617.69 | c     | IAV    | 7        | IL10 | 106.98   | c     | IAV    | 7        | IFNB1 | 26123.08  | c     | IAV    | 7        | CXCL8 | 414265.02 | c     | IAV    | 7        | CXCL10 | 1916335.90 | c     | IAV    | 7        | CCL2 | 1936.95  |       |        |          |      |          |
| c     | IAV    | 8        | MUC5AC | 1698.30  | c     | IAV    | 8        | CCL5 | 276012.62 | c     | IAV    | 8        | IL10 | 127.57   | c     | IAV    | 8        | IFNB1 | 12880.97  | c     | IAV    | 8        | CXCL8 | 500806.58 | c     | IAV    | 8        | CXCL10 | 1858520.77 | c     | IAV    | 8        | CCL2 | 1265.67  |       |        |          |      |          |
| a     | Mock   | 1        | MUC5B  | 3204.94  | a     | Mock   | 1        | IL6  | 5.59      | a     | Mock   | 1        | IL1B | 2396.13  | a     | Mock   | 1        | RSAD2 | 524.93    | a     | Mock   | 1        | CSF2  | 70.31     | a     | Mock   | 1        | CCL3   | 5.79       | a     | Mock   | 1        | TNF  | 32.42    |       |        |          |      |          |
| a     | Mock   | 2        | MUC5B  | 4618.26  | a     | Mock   | 2        | IL6  | 16.13     | a     | Mock   | 2        | IL1B | 2093.43  | a     | Mock   | 2        | RSAD2 | 592.33    | a     | Mock   | 2        | CSF2  | 70.37     | a     | Mock   | 2        | CCL3   |            | a     | Mock   | 2        | TNF  | 42.98    |       |        |          |      |          |
| a     | Mock   | 3        | MUC5B  | 6706.97  | a     | Mock   | 3        | IL6  | 21.10     | a     | Mock   | 3        | IL1B | 1791.30  | a     | Mock   | 3        | RSAD2 | 569.64    | a     | Mock   | 3        | CSF2  | 125.36    | a     | Mock   | 3        | CCL3   | 3.39       | a     | Mock   | 3        | TNF  | 17.70    |       |        |          |      |          |
| a     | Mock   | 4        | MUC5B  | 5663.69  | a     | Mock   | 4        | IL6  | 48.84     | a     | Mock   | 4        | IL1B | 1862.47  | a     | Mock   | 4        | RSAD2 | 428.39    | a     | Mock   | 4        | CSF2  | 136.54    | a     | Mock   | 4        | CCL3   | 2.46       | a     | Mock   | 4        | TNF  | 49.72    |       |        |          |      |          |
| a     | IAV    | 5        | MUC5B  | 2123.13  | a     | IAV    | 5        | IL6  | 2142.42   | a     | IAV    | 5        | IL1B | 4507.22  | a     | IAV    | 5        | RSAD2 | 236792.01 | a     | IAV    | 5        | CSF2  | 209.09    | a     | IAV    | 5        | CCL3   | 89.77      | a     | IAV    | 5        | TNF  | 2991.31  |       |        |          |      |          |
| a     | IAV    | 6        | MUC5B  | 2389.81  | a     | IAV    | 6        | IL6  | 2173.26   | a     | IAV    | 6        | IL1B | 3927.04  | a     | IAV    | 6        | RSAD2 | 222712.12 | a     | IAV    | 6        | CSF2  | 171.86    | a     | IAV    | 6        | CCL3   | 78.44      | a     | IAV    | 6        | TNF  | 2608.89  |       |        |          |      |          |
| a     | IAV    | 7        | MUC5B  | 1997.59  | a     | IAV    | 7        | IL6  | 1975.68   | a     | IAV    | 7        | IL1B | 3780.67  | a     | IAV    | 7        | RSAD2 | 240972.81 | a     | IAV    | 7        | CSF2  | 228.78    | a     | IAV    | 7        | CCL3   | 127.68     | a     | IAV    | 7        | TNF  | 2396.59  |       |        |          |      |          |
| a     | IAV    | 8        | MUC5B  | 1583.81  | a     | IAV    | 8        | IL6  | 1271.41   | a     | IAV    | 8        | IL1B | 3139.78  | a     | IAV    | 8        | RSAD2 | 251944.33 | a     | IAV    | 8        | CSF2  | 78.52     | a     | IAV    | 8        | CCL3   | 42.06      | a     | IAV    | 8        | TNF  | 1665.97  |       |        |          |      |          |
| b     | Mock   | 1        | MUC5B  | 8018.78  | b     | Mock   | 1        | IL6  | 71.65     | b     | Mock   | 1        | IL1B | 3491.57  | b     | Mock   | 1        | RSAD2 | 479.45    | b     | Mock   | 1        | CSF2  | 147.45    | b     | Mock   | 1        | CCL3   | 2.60       | b     | Mock   | 1        | TNF  | 129.88   |       |        |          |      |          |
| b     | Mock   | 2        | MUC5B  | 7674.82  | b     | Mock   | 2        | IL6  | 98.73     | b     | Mock   | 2        | IL1B | 4585.17  | b     | Mock   | 2        | RSAD2 | 506.54    | b     | Mock   | 2        | CSF2  | 350.70    | b     | Mock   | 2        | CCL3   |            | b     | Mock   | 2        | TNF  | 187.89   |       |        |          |      |          |
| b     | Mock   | 3        | MUC5B  | 5815.49  | b     | Mock   | 3        | IL6  | 96.87     | b     | Mock   | 3        | IL1B | 6192.51  | b     | Mock   | 3        | RSAD2 | 574.17    | b     | Mock   | 3        | CSF2  | 172.94    | b     | Mock   | 3        | CCL3   |            | b     | Mock   | 3        | TNF  | 173.85   |       |        |          |      |          |
| b     | Mock   | 4        | MUC5B  | 6981.69  | b     | Mock   | 4        | IL6  | 54.20     | b     | Mock   | 4        | IL1B | 4374.14  | b     | Mock   | 4        | RSAD2 | 530.22    | b     | Mock   | 4        | CSF2  | 328.35    | b     | Mock   | 4        | CCL3   | 3.69       | b     | Mock   | 4        | TNF  | 189.73   |       |        |          |      |          |
| b     | IAV    | 5        | MUC5B  | 2710.46  | b     | IAV    | 5        | IL6  | 2616.05   | b     | IAV    | 5        | IL1B | 10983.26 | b     | IAV    | 5        | RSAD2 | 175875.72 | b     | IAV    | 5        | CSF2  | 573.40    | b     | IAV    | 5        | CCL3   | 155.39     | b     | IAV    | 5        | TNF  | 4797.87  |       |        |          |      |          |
| b     | IAV    | 6        | MUC5B  | 2664.03  | b     | IAV    | 6        | IL6  | 3533.47   | b     | IAV    | 6        | IL1B | 8673.16  | b     | IAV    | 6        | RSAD2 | 206723.25 | b     | IAV    | 6        | CSF2  | 515.51    | b     | IAV    | 6        | CCL3   | 125.94     | b     | IAV    | 6        | TNF  | 4682.70  |       |        |          |      |          |
| b     | IAV    | 7        | MUC5B  | 3022.77  | b     | IAV    | 7        | IL6  | 3356.17   | b     | IAV    | 7        | IL1B | 9938.89  | b     | IAV    | 7        | RSAD2 | 145822.37 | b     | IAV    | 7        | CSF2  | 465.89    | b     | IAV    | 7        | CCL3   | 130.66     | b     | IAV    | 7        | TNF  | 4332.55  |       |        |          |      |          |
| b     | IAV    | 8        | MUC5B  | 3774.35  | b     | IAV    | 8        | IL6  | 2585.64   | b     | IAV    | 8        | IL1B | 9435.43  | b     | IAV    | 8        | RSAD2 | 153849.27 | b     | IAV    | 8        | CSF2  | 492.85    | b     | IAV    | 8        | CCL3   | 122.15     | b     | IAV    | 8        | TNF  | 4323.47  |       |        |          |      |          |
| c     | Mock   | 1        | MUC5B  | 10684.24 | c     | Mock   | 1        | IL6  | 27.37     | c     | Mock   | 1        | IL1B | 1127.20  | c     | Mock   | 1        | RSAD2 | 471.38    | c     | Mock   | 1        | CSF2  | 51.64     | c     | Mock   | 1        | CCL3   |            | c     | Mock   | 1        | TNF  | 16.60    |       |        |          |      |          |
| c     | Mock   | 2        | MUC5B  | 9086.60  | c     | Mock   | 2        | IL6  | 8.92      | c     | Mock   | 2        | IL1B | 1474.32  | c     | Mock   | 2        | RSAD2 | 873.51    | c     | Mock   | 2        | CSF2  | 91.71     | c     | Mock   | 2        | CCL3   | 3.03       | c     | Mock   | 2        | TNF  | 49.06    |       |        |          |      |          |
| c     | Mock   | 3        | MUC5B  | 18973.43 | c     | Mock   | 3        | IL6  | 73.76     | c     | Mock   | 3        | IL1B | 1372.69  | c     | Mock   | 3        | RSAD2 | 807.85    | c     | Mock   | 3        | CSF2  | 95.04     | c     | Mock   | 3        | CCL3   | 2.74       | c     | Mock   | 3        | TNF  | 65.91    |       |        |          |      |          |
| c     | Mock   | 4        | MUC5B  | 10880.09 | c     | Mock   | 4        | IL6  | 24.95     | c     | Mock   | 4        | IL1B | 1056.06  | c     | Mock   | 4        | RSAD2 | 344.99    | c     | Mock   | 4        | CSF2  | 88.70     | c     | Mock   | 4        | CCL3   | 2.90       | c     | Mock   | 4        | TNF  | 40.87    |       |        |          |      |          |
| c     | IAV    | 5        | MUC5B  | 3488.19  | c     | IAV    | 5        | IL6  | 2547.39   | c     | IAV    | 5        | IL1B | 2705.35  | c     | IAV    | 5        | RSAD2 | 163328.50 | c     | IAV    | 5        | CSF2  | 495.57    | c     | IAV    | 5        | CCL3   | 148.02     | c     | IAV    | 5        | TNF  | 2202.15  |       |        |          |      |          |
| c     | IAV    | 6        | MUC5B  | 14811.39 | c     | IAV    | 6        | IL6  | 2811.38   | c     | IAV    | 6        | IL1B | 3883.29  | c     | IAV    | 6        | RSAD2 | 243507.79 | c     | IAV    | 6        | CSF2  | 362.00    | c     | IAV    | 6        | CCL3   | 160.05     | c     | IAV    | 6        | TNF  | 3535.36  |       |        |          |      |          |
| c     | IAV    | 7        | MUC5B  | 5734.23  | c     |        |          |      |           |       |        |          |      |          |       |        |          |       |           |       |        |          |       |           |       |        |          |        |            |       |        |          |      |          |       |        |          |      |          |



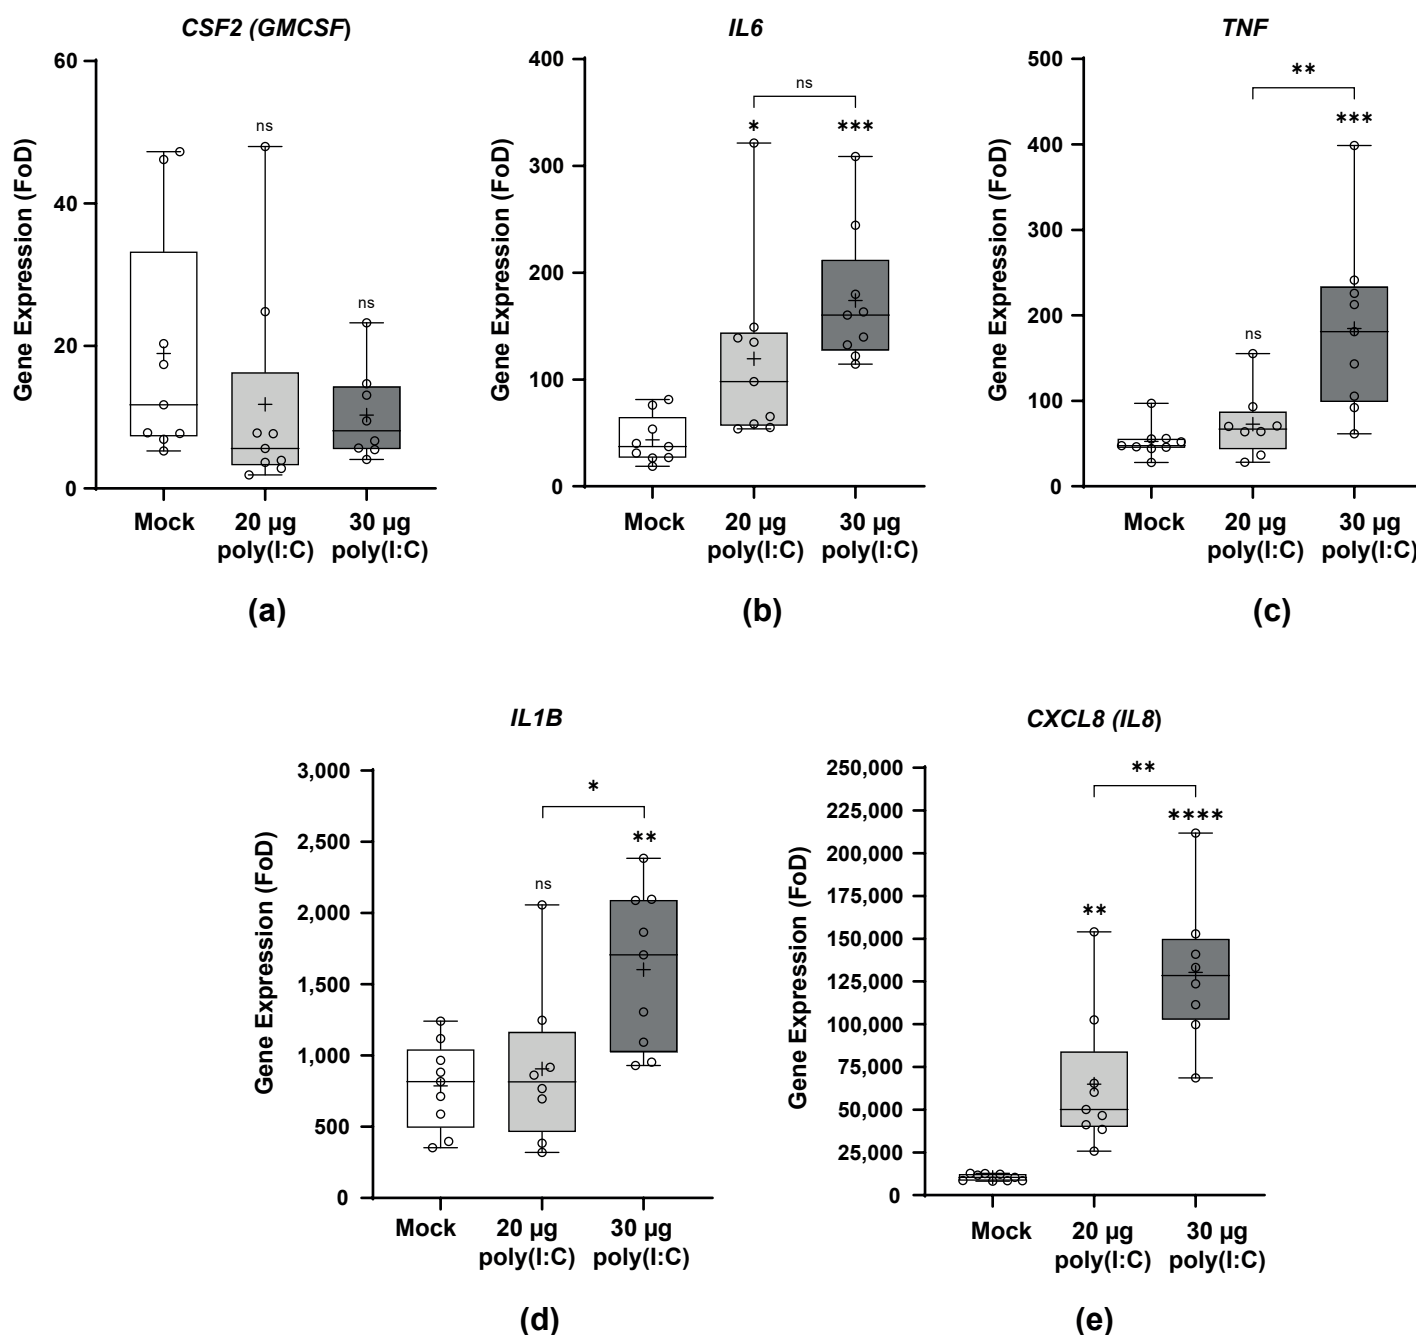

**Figure S8. Poly(I:C) stimulation of innate immune response genes in wdNHBE cells**

Gene expression in wdNHBEs 48 h post-treatment with 20 µg and 30 µg poly(I:C) was assayed by RT-qPCR and compared to mock (ALI media)-treated cells. Gene expression is shown as fold over detectable (FoD), where the minimum level detectable was set at 40 cycles. Expression was normalized to *GAPDH* and data pooled from three independent experiments. (a) *CSF2* (*GMCSF*), (b) *IL6*, (c) *TNF*, (d) *IL1B* and (e) *CXCL8* (*IL8*). Data are presented as box and whisker plots which show the mean (+), median, interquartile range and maximum and minimum values. The ends of each box represent the upper and lower quartiles, the horizontal line within the box shows the median value and error bars indicate the minimum and maximum values. Individual values are depicted by open circles. The statistical significance of poly(I:C) versus mock treated cells was determined by one-way ANOVA using Tukey's multiple comparison test. ns, not significant; \*,  $p < 0.05$ ; \*\*,  $p < 0.01$ ; \*\*\*,  $p < 0.001$ ; \*\*\*\*,  $p < 0.0001$ . The number of biological replicates per gene and per treatment are mock,  $n = 9$  per gene; 20 µg poly(I:C),  $n = 9$  per gene ( $n = 8$  for *IL1B* and *TNF*) and 30 µg poly(I:C),  $n = 9$  per gene ( $n = 8$  for *CXCL8*).

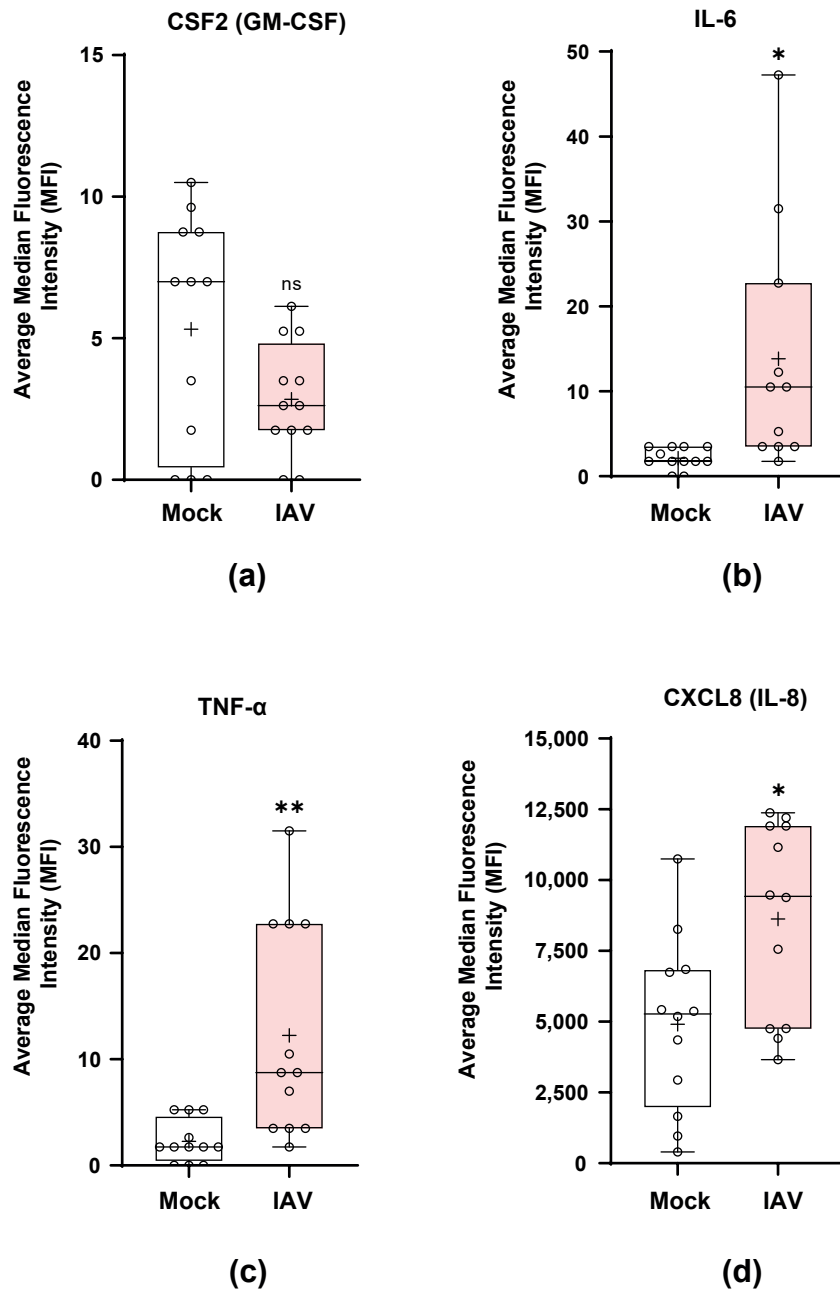

**Figure S9. The basolateral secretion of cytokines and chemokines by wdNHBE cells in response to infection with IAV H1N1pdm09**

The proinflammatory cytokines CSF2, IL-6 and TNF- $\alpha$  and the CXCL8 chemokine secreted into the basolateral (lower) compartment by wdNHBE cells infected with H1N1pdm09 or mock-inoculated with ALI media were assayed 30 h post-infection by multiplex immunoassays. At 24 h post-IAV infection, basolateral media was replaced and then collected 6 h later at the experiment endpoint. Data from three independent experiments was pooled and analysed by unpaired two-tailed t-tests. Data are presented as the average median fluorescence intensity (MFI) of  $n=12$  biological replicates for GM-CSF, TNF- $\alpha$  and CXCL8 and  $n=11$  replicates for IL-6. IL-1 $\beta$  was omitted as values were at the minimum level of detection. Data are depicted as box and whisker plots which show the mean (+), median, interquartile range and maximum and minimum values. The ends of each box represent the upper and lower quartiles, the horizontal line within the box shows the median value and error bars indicate the minimum and maximum values. Individual values are depicted by open circles. Statistical significance is indicated: ns, not significant; \*,  $p<0.05$ ; \*\*,  $p<0.01$ .

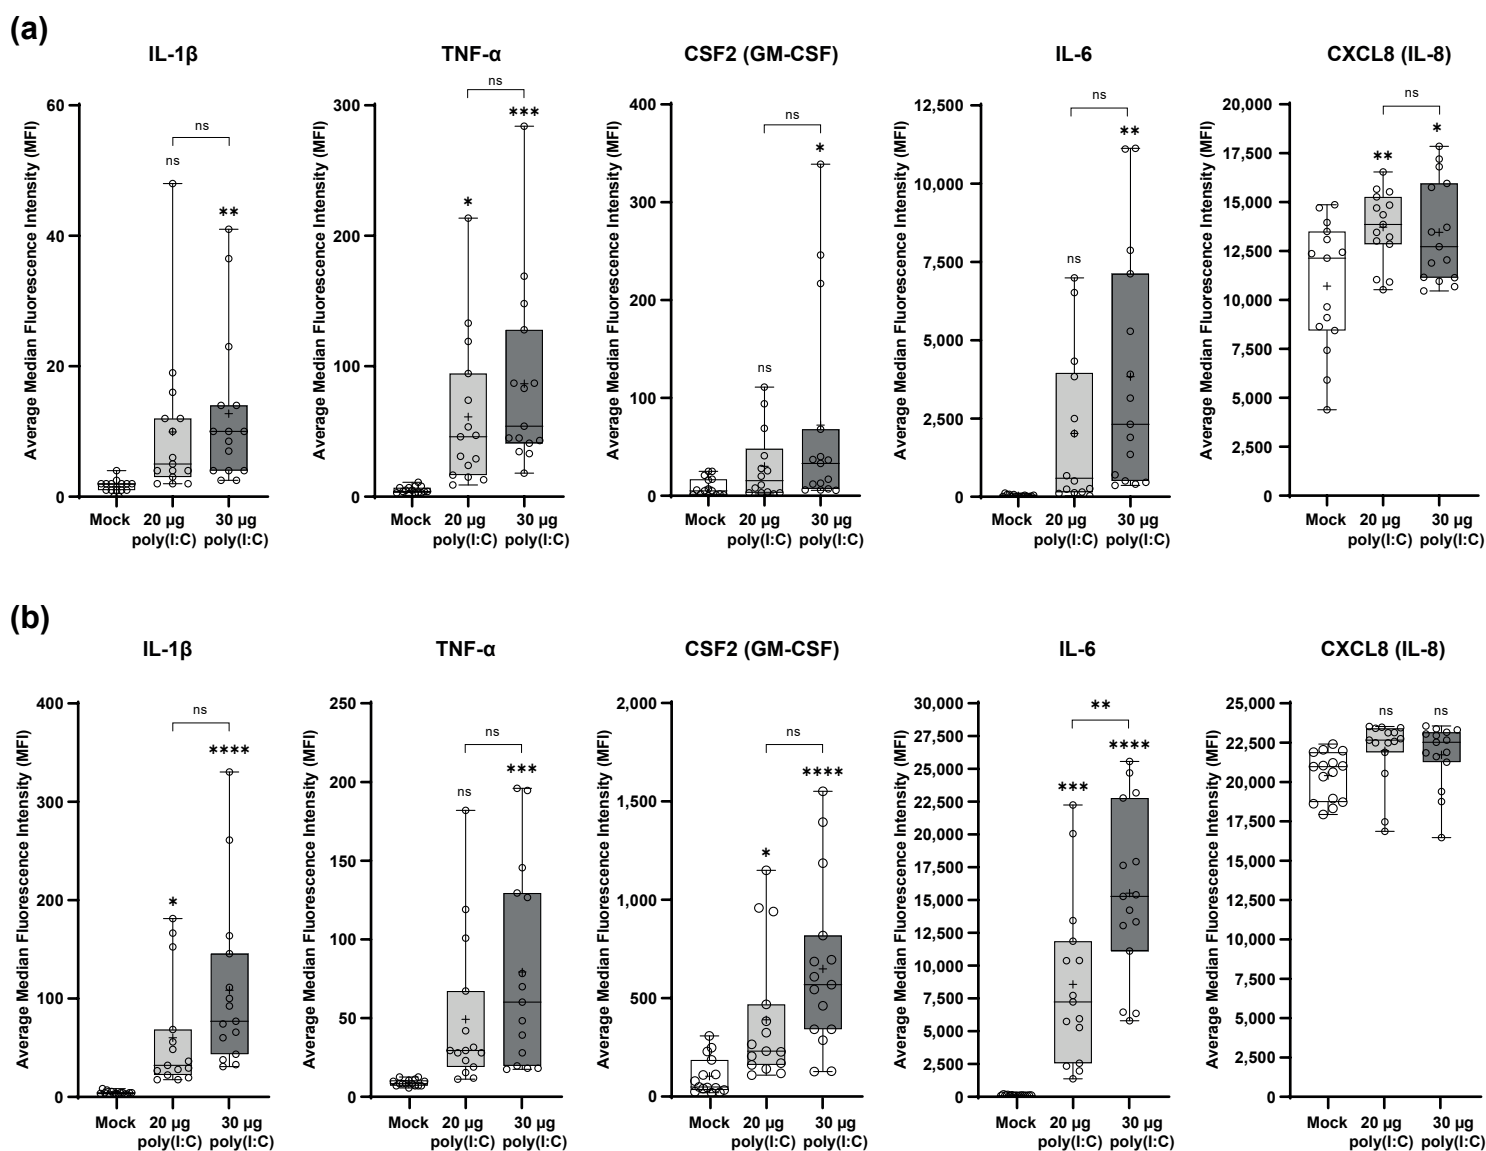

**Figure S10. The apical and basolateral secretion of cytokines and chemokines by wdNHBE cells in response to poly(I:C) treatment**

The proinflammatory cytokines IL-1 $\beta$ , CSF2, TNF- $\alpha$  and IL-6, and the CXCL8 chemokine secreted into the (a) apical and (b) basolateral compartments by wdNHBE cells were assayed 48 h post-treatment with 20 and 30  $\mu$ g poly(I:C) and compared to mock-treated (ALI media) cells by multiplex immunoassays. Apical samples were collected at the experiment endpoint. ALI media was added to the apical surface, the cells incubated for 30 min and apical proteins secreted into the supernatant collected. Basolateral media was changed 24 h post-poly(I:C) inoculation and then collected 48 h later on Day 3. Data from three independent experiments was combined and analysed by one-way ANOVA using Tukey's multiple comparison test. Data are presented as box and whisker plots which show the mean (+), median, interquartile range and maximum and minimum values. The ends of each box represent the upper and lower quartiles, the horizontal line within the box indicates the median value and error bars show the minimum and maximum values. Individual values are depicted by open circles. n=45 biological replicates per cytokine, 15 per treatment were analysed for IL-1 $\beta$ , TNF- $\alpha$ , CSF2, IL-6, and CXCL8. Statistical significance is indicated: ns, not significant; \*, p<0.05; \*\*, p<0.01; \*\*\*, p<0.001; \*\*\*\*, p<0.0001.
